## The contribution of genetic variation of *Streptococcus pneumoniae* to the clinical manifestation of invasive pneumococcal disease

Amelieke JH Cremers MD PhD<sup>1,2\*</sup>, Fredrick M Mobegi PhD<sup>1,3</sup>, Christa van der Gaast – de Jongh<sup>1</sup>, Michelle van Weert MD<sup>1</sup>, Fred J van Opzeeland<sup>1</sup>, Minna Vehkala PhD<sup>4</sup>, Mirjam J Knol PhD<sup>5</sup>, Hester J Bootsma PhD<sup>5</sup>, Niko Välimäki PhD<sup>4</sup>, Jacques F Meis MD<sup>6</sup>, Stephen Bentley PhD<sup>7</sup>, Sacha AFT van Hijum PhD<sup>3,8</sup>, Jukka Corander PhD<sup>4,7,9</sup>, Aldert L Zomer PhD<sup>10</sup>, Gerben Ferwerda MD PhD<sup>1</sup>, Marien I de Jonge PhD<sup>1</sup>

<sup>1</sup>Laboratory of Pediatric Infectious Diseases, Radboudumc, Nijmegen, the Netherlands

<sup>2</sup>Department of Medical Microbiology, Radboudumc, Nijmegen, the Netherlands

<sup>3</sup>Bacterial Genomics Group, Center for Molecular and Biomolecular Informatics; Radboudumc, Nijmegen, the Netherlands

<sup>4</sup>Department of Mathematics and Statistics, University of Helsinki, Helsinki, Finland

<sup>5</sup>Centre for Infectious Disease Control (CIb), RIVM National Institute for Public Health and the Environment, Bilthoven, the Netherlands

<sup>6</sup>Department of Medical Microbiology and Infectious Diseases, Canisius-Wilhelmina Hospital, Nijmegen, the Netherlands

<sup>7</sup>Wellcome Trust Sanger Institute, Pathogen Genomics group, Hinxton Cambridge, United Kingdom

<sup>8</sup>NIZO, Ede, the Netherlands

<sup>9</sup>Department of Biostatistics, University of Oslo, Oslo, Norway

<sup>10</sup>Department of Infectious Diseases and Immunology, Veterinary Faculty, Utrecht University, Utrecht, The Netherlands

\*Corresponding author: Amelieke JH Cremers, MD PhD

Email: [Amelieke.cremers@radboudumc.nl](mailto:Amelieke.cremers@radboudumc.nl) Phone: 0031-24-3619041

1 **Abstract**

2

3 **Background** Different clinical manifestations of invasive pneumococcal disease (IPD) have thus far mainly  
4 been explained by patient characteristics. Here we studied the contribution of pneumococcal genetic  
5 variation to IPD phenotype.

6 **Methods** The index cohort consisted of 349 patients admitted to two Dutch hospitals between 2000-  
7 2011 with pneumococcal bacteraemia. We performed genome-wide association studies to identify  
8 pneumococcal lineages, genes and allelic variants associated with 23 clinical IPD phenotypes. The  
9 identified associations were validated in a nationwide (n=482) and a post-pneumococcal vaccination  
10 cohort (n=121). The contribution of confirmed pneumococcal genotypes to the clinical IPD phenotype,  
11 relative to known clinical predictors, was tested by regression analysis.

12 **Findings** The presence of pneumococcal gene *slaA* was a nationwide confirmed independent predictor of  
13 meningitis (OR=10.5, p=0.001), as was sequence cluster 9 (OR=3.68, p=0.057). A set of 4 pneumococcal  
14 genes co-located on a prophage was a confirmed independent predictor of 30-day mortality (OR=3.4,  
15 p=0.003). We could detect the pneumococcal variants of concern in these patients' blood samples by  
16 molecular amplification. In the post-vaccination cohort where the distribution of both patient  
17 characteristics and pneumococcal serotypes had changed, the relative importance of the prophage was  
18 no longer supported.

19 **Interpretation** Knowledge of pneumococcal genotypic variants improved our clinical risk assessment for  
20 detrimental manifestations of IPD. This provides us with novel opportunities to target, anticipate or avert  
21 the pathogenic effects that are related to particular pneumococcal variants. Therefore, future  
22 diagnostics should facilitate prompt appreciation of pathogen diversity in clinical sepsis management.  
23 Ongoing surveillance is warranted to monitor the clinical value of information on pathogen variants in  
24 dynamic microbial and susceptible host populations.

25 **Funding** None.

26 **Background**

27  
28 Invasive pneumococcal disease (IPD) is a threat to both the patient as well as the pneumococcus.<sup>1</sup> It  
29 occurs nonetheless, and is a major cause of morbidity and mortality worldwide.<sup>2</sup> The variety in clinical  
30 presentations across IPD patients is considerable, and not fully explained by host factors alone.<sup>3</sup> It is  
31 therefore of interest to investigate whether it matters which pneumococcal variant happens to  
32 proliferate in the body.

33  
34 Invasive disease includes ongoing presence of bacteria in blood and further sterile body sites like the  
35 pleural cavity and cerebrospinal fluid, corresponding with the clinical syndromes bacteraemia, empyema,  
36 and meningitis respectively. The reasons for these phenomena to occur mainly include flaws in host  
37 defence.<sup>4-6</sup> Although “invasive” pneumococcal traits have been suggested as well,<sup>7,8</sup> the large variety of  
38 pneumococci retrieved from IPD and the replacement of serotypes observed after the introduction of  
39 pneumococcal conjugate vaccines (PCVs) temper the importance of pneumococcal variation as  
40 determinant of invasive disease.<sup>9,10</sup>

41  
42 Patients who have acquired pneumococci in their bloodstream do not always develop sepsis and clinical  
43 presentations vary from mild respiratory disease to imminent death.<sup>11</sup> Aside from the classical vulnerable  
44 elderly patient who slowly recovers from pneumococcal pneumonia upon in-hospital treatment, IPD can  
45 manifest at all ages, in a range of body sites, with varying severity and sequelae. It is important to  
46 understand the origins of this diversity. Despite the introduction of uniform clinical guidelines and  
47 vaccines, the global pneumococcal disease burden remains high<sup>9,12,13</sup> and patients may benefit from  
48 more tailored adjunctive measures targeting the effects of specific pneumococcal variants.<sup>14</sup>

49

50 The diversity in pneumococcal variants, illustrated by over 95 different capsular serotypes, has long been  
51 appreciated in pneumococcal vaccination and surveillance. *S. pneumoniae* is a naturally competent  
52 organism that fosters genetic recombination via transformation throughout its entire genome.<sup>15</sup>  
53 Although pneumococcal serotypes have been related to particular clinical manifestations of IPD,<sup>16</sup> it is  
54 unsure if the capsule is solely responsible.

55  
56 Here we studied whether genome-wide pneumococcal variants were associated with clinical  
57 manifestations of human IPD in naturally occurring patient populations.

58 **Methods**

59

60 *Three clinical cohorts*

61 The index cohort consisted of 349 patients diagnosed with a pneumococcal bacteraemia admitted to two  
62 Dutch hospitals between January 2000 and June 2011. For the geographical validation cohort 482 adults  
63 with IPD admitted to 20 other Dutch hospitals (having blood cultures assessed in 9 sentinel laboratories)  
64 between June 2004 - December 2006 and June 2008 - May 2012 (periods for which clinical metadata  
65 were available) were randomly selected from the National Surveillance Database.<sup>17,18</sup> The temporal  
66 validation cohort was collected from one index hospital, and consisted of 121 pneumococcal  
67 bacteraemia patients hospitalized between November 2012 and February 2016. In the latter cohort the  
68 distribution of pneumococcal serotypes had markedly changed since the introduction of PCVs in the  
69 Dutch National Immunisation Programme for infants (7-valent PCV in 2006, 10-valent PCV in 2011). This  
70 observational study was approved by the Medical Ethical Committees of the participating hospitals.

71 Clinical data were collected from medical charts. Details on handling and formatting of clinical variables  
72 for each analysis are described in Supplementary methods 1. Normality of continuous variables was  
73 tested by Shapiro-Wilk test, and differences in characteristics in comparison to the index cohort were  
74 tested with a 2-sided Student's t-test or Mann-Whitney U test accordingly. Differences in nominal  
75 variables were tested by 2-sided Chi-square testing (Fisher's exact if less than 10 cases in any cell).

76 Pneumococcal blood isolates were stored in 10% glycerol 10% skim milk at -80°C. Serotypes were  
77 determined by capsular PCR and Quellung reaction, confirmed by molecular capsular typing in whole  
78 genome sequenced strains. From isolates at the index hospitals, DNA was isolated with Qiagen Genomic-  
79 tip 20/G after culture to OD<sub>620</sub> 0.2-0.3 in 10ml Todd Hewitt broth with 5% yeast extract at 37°C. DNA  
80 template from the National Surveillance isolates was prepared as a lysate by heating a 2ml overnight  
81 culture at 90°C for 10 minutes.

82

83 *Genome-wide analyses in the index cohort*

84 Whole genome sequencing and assembly, as well as determination of orthologous genes (OGs),  
85 functional annotations, core genome, population phylogeny, and population structure (i.e. the  
86 identification of genetically diverged subpopulations which are called sequence clusters) were  
87 performed for the 349 isolates from the index cohort as previously described.<sup>10</sup>

88 The relationship between sequence cluster (SC) and 23 clinical IPD phenotypes was explored by stepwise  
89 regression analysis. Dependent variables were clinical IPD phenotypes, and each sequence cluster was  
90 entered as a binary independent variable. The models included a constant, with variable entry set at  
91 0.05, and removal at 0.05 for logistic and at 0.1 for linear regression.

92 We performed two different genome wide association studies in the index cohort. First we investigated  
93 the relationship between the presence of each individual OG on the accessory pneumococcal genome  
94 and the clinical IPD phenotype. For this analysis OGs present in <98% and >2% of cases were selected.  
95 Associations with binary clinical variables were assessed by Fisher's exact with cluster permutation and  
96 by Cochran-Mantel-Haenszel analyses implemented in PLINK.<sup>19</sup> Sequence cluster (SC) was introduced as  
97 the nominal covariate to adjust for population structure, and p-values were false discovery rate-  
98 corrected to adjust for multiple testing by the Benjamini-Hochberg procedure. Second we investigated  
99 the relationship between any allelic variant present anywhere on the genome and the clinical IPD  
100 phenotype. K-mers (DNA-words of 10 to 99 base pairs) were identified from draft assemblies by  
101 distributed string mining, and subsequently filtered for adjacent bases having a different frequency  
102 support vector in the study cohort, and for being associated with each phenotype at p-values < 1e-5 in  
103 univariate chi-square testing. Associations between the selected k-mers and binary clinical IPD  
104 phenotypes were assessed by sequence element enrichment (SEER) analysis,<sup>20</sup> including correction for  
105 population structure by multi-dimensional scaling using a random subset of k-mers. The origin of k-mers

106 was determined by alignment to the annotated draft genomes of the index cohort with complete  
107 coverage and identity using BLAST. To adjust for multiple testing, the significance threshold was set at  
108  $1e-8$ .

109

#### 110 *Validation of associations*

111 We aimed to validate a selection of the identified OGs that were significantly associated with a clinical  
112 IPD phenotype, irrespective of their functional annotation, in a nation-wide cohort. In the temporal  
113 validation cohort the number of identified genes evaluated was constrained by the number of cases in  
114 that collection period. The size of the validation cohorts was calculated to detect the index differences  
115 with a power of at least 0.8 and alpha of 0.05 in a 1-sided fashion. Because the similarity in distribution  
116 of phenotypes and OGs in the validation cohorts was uncertain, the significance threshold for validation  
117 was set at 0.1.

118 To determine the presence of the OGs of interest on pneumococcal genomes in the validation cohorts,  
119 primers were designed and validated based on the index cohort, using a real-time fluorescent read out.  
120 The 20 $\mu$ l reaction mix contained 1x SsoAdvanced universal SYBR Green supermix, 200nM of each primer  
121 and as template either 0.005ng Qiagen genomic tip DNA or 200 times diluted pneumococcal lysate which  
122 yielded similar Ct-values. Cycling conditions were 95°C 3min; 40 cycles of 95°C 10sec and 55°C 30sec;  
123 95°C 10sec; melting curve 65 to 95°C with 0.5°C/sec increase. All diluted templates were tested for  
124 detection of the *gyrA* pneumococcal housekeeping gene. All PCR runs included positive and negative  
125 control samples from the index cohort, plus negative extraction and PCR controls, and the specificity of  
126 produced amplicon for the OG of interest was confirmed by its melting temperature (Supplementary  
127 methods 2).

128

#### 129 *Confirmed pneumococcal genotypes*



130 Co-occurrence of confirmed genotypes with other sequence variants was determined by Pearson  
131 correlation. Co-localization of confirmed OGs with bacteriophages was assessed by identification of  
132 predicted prophage sequences in the draft genomes of the index cohort using PHASTER.<sup>21</sup> Sequence  
133 variation within the confirmed OGs and prophages was expressed in size, GC-content and pairwise  
134 distances. Distances were calculated from amino acid alignments, using the MEGA7 p-distance metric  
135 assuming gamma distribution with pairwise deletion of ambiguous positions.

136

### 137 *Clinical relevance*

138 The relative contribution of the identified pneumococcal genotypes to the clinical IPD phenotype in  
139 relation to well-known clinical predictors was assessed by logistic regression analysis as described  
140 elsewhere,<sup>22</sup> with the addition of the significantly associated sequence clusters.

141 To explore clinical detection of pneumococcal variants during IPD, stored serum samples collected from  
142 IPD patients at day 0-3 of hospitalization were retrieved from -40°C. The pneumococcal genomic DNA  
143 load in the serum samples was assessed previously.<sup>23</sup> We selected those serum samples on which  
144 capsular sequence typing had previously been successful.<sup>24</sup> DNA was isolated from 100µl of serum using  
145 Qiagen's DNeasy Blood and tissue kit. The OG validation PCRs (not matching human DNA sequences)  
146 were performed in duplicate using 8µl of template DNA and 50 amplification cycles.

147

148 Unless stated otherwise, the significance threshold was set at 0.05.

149 **Results**

150

151 *Three clinical cohorts*

152 Although the geographical validation cohort largely overlapped with the study period of the index  
153 cohort, serotypes appeared to be not evenly distributed (Figure 1). The temporal validation cohort was  
154 included to monitor identified associations in changing populations. In this cohort the patient  
155 characteristics of IPD cases had altered as compared to the index cohort, and serotypes clearly changed  
156 in response to pneumococcal vaccination. However, the distribution of IPD syndromes and outcomes  
157 had remained stable over time.

158

159 *Genome-wide analyses in the index cohort*

160 Of the 23 tested clinical manifestations of IPD 87% appeared to be associated with one or more  
161 pneumococcal sequence clusters (SCs) (Table 1).

162 In the first GWAS we studied the relationship between the presence of individual orthologous genes  
163 (OGs) on the accessory pneumococcal genome and the clinical IPD phenotype. Independently from SC,  
164 68 of the 1127 selected pneumococcal OGs were associated with nine different clinical IPD phenotypes  
165 (Supplementary file 1, and most pronounced associations displayed in Figure 2).

166 Another method was used to identify genome-wide associations with any allelic variant, or k-mer,  
167 present anywhere on the genome and the clinical IPD phenotype. The identified k-mers had nucleotide  
168 sequences that aligned with members of up to 6 different OGs. This number of origins was inversely  
169 related to k-mer size as well as to the proportion of core (versus accessory) OG origins. None of the  
170 15,249,832 identified unique k-mers met the genome-wide significance threshold in their SC-  
171 independent association with clinical IPD phenotypes (Supplementary table 1). Despite this, certain OGs

172 were overrepresented as they contained multiple variable regions related to a particular phenotype  
173 (Supplementary table 2).

174

#### 175 *Validation of associations*

176 Only associations with OGs were taken into validation, because validation of associations with SCs and k-  
177 mers would have required fully sequenced clinical validation cohorts. OG\_17 was considered to be a  
178 proxy for OG\_761 because of their consistency in the index cohort. PCR assays were successful for 8 out  
179 of 10 OGs selected for validation (Supplementary methods 3). The size of the temporal validation cohort  
180 only allowed for validation of the OGs associated with 30-day mortality. All diluted templates from  
181 isolates in both validation cohorts (n=603) were positive for the *gyrA* pneumococcal housekeeping gene  
182 with a Ct-value of  $24 \pm 2$ . Out of the nine OG-phenotype combinations from the index cohort tested, four  
183 were confirmed in the geographical validation cohort (Figure 3) and further characterised as described  
184 below.

185

#### 186 *Confirmed pneumococcal genotypes*

187 The confirmed OG\_2721 related to meningitis was functionally annotated as *slaA* coding for  
188 phospholipase A2, and showed 100% anti-occurrence with OG\_416 (a predicted membrane protein) and  
189 OG\_679 (ABC transporter) in the index cohort. The three confirmed OGs related to 30-day mortality  
190 were annotated as phage proteins (OG\_17 specified as *pbIB* encoding a prophage tail fiber protein), and  
191 showed high co-occurrence with each other in all three cohorts (Figure 4). In the index cohort, all *pbIB*  
192 homologues were located either within borders of predicted prophage elements, or located near contig  
193 breaks or on short contigs, thus representing circumstances under which prophage elements cannot be  
194 identified from draft genomes. While all sequences of OG\_2721 were identical, other OGs showed large  
195 variation (Supplementary Figure 1). Within OG\_17 and OG\_58 the number of pairwise amino acid

196 positions exceeded the number expected from their largest sequence variant. This suggests genetic  
197 mosaicism which is typical for bacteriophage genes. In the distribution of the confirmed OGs in the  
198 pneumococcal populations, OG\_17 was taken as a proxy for its joint prophage vector shared with  
199 OG\_675 and OG\_58 (Supplementary Figure 2). In addition to presence, also the number of open reading  
200 frames per OG present in an isolate strongly correlated between these three OGs. While all confirmed  
201 OGs were present in both vaccine and non-vaccine serotypes, the relative occurrence of OG\_2721 in IPD  
202 cases remained stable over time, yet OG\_17 waned.

203

#### 204 *Clinical relevance*

205 Relative to clinical predictors of meningitis and 30-day mortality, pneumococcal sequence clusters and  
206 orthologous genes were still major independent determinants of these phenotypes (Table 2).

207 OG\_2721 associated with meningitis was correctly only detected by PCR in serum from patient  
208 PBCN0382 (Table 3). For 30-day mortality, OG\_675 was most accurately and consistently identified in  
209 serum from patients with low pneumococcal DNA loads.

210 **Discussion**

211 Through comparative genomics we identified pneumococcal genetic variants (sequence clusters and  
212 orthologous genes) to be independent determinants of clinical manifestations of IPD, supported by  
213 validation in a separate cohort. These pneumococcal sequence variants could be detected in serum  
214 samples from IPD patients by PCR.

215  
216 Prediction of clinical phenotypes as performed in this study comes with two particular challenges. First,  
217 for the identification of certain clinical syndromes one relies on the assessment and examinations  
218 performed by the attending physician. Missed diagnosis of for example meningitis cannot be ruled out,  
219 given that the absence of cough was one of its main predictors. While uncertainty in sensitivity is  
220 inherent to studying clinical phenotypes, the specificity of affected cases is robust as only laboratory  
221 confirmed cases of meningitis were classified as such. In fact, instant knowledge of pneumococcal  
222 genotype could be used to improve future recognition of particular disease manifestations. Second,  
223 although mortality from IPD is more easy to establish, its determinants can vary widely across different  
224 clinical settings.<sup>25</sup> We have observed in our temporal post-vaccination validation cohort, that the relative  
225 contribution of pneumococcal variants to mortality may also be influenced by an altered composition of  
226 the pneumococcal population itself. Therefore, validity of our findings in other settings should be tested.  
227 At the same time, it is difficult to estimate a sample size threshold at which to reject validity because  
228 other settings commonly differ in standards of care, population at risk,<sup>26</sup> antibiotic resistance level, and  
229 serotype distribution.<sup>27</sup> Therefore, although targeted validation as performed in our relatively similar  
230 clinical cohorts seems appropriate, in very dissimilar populations *de novo* identification of relevant  
231 pneumococcal genotypes may be a more efficient approach.

232 Our non-selective method including genome-wide pneumococcal variants in naturally occurring IPD  
233 populations ensured the likelihood that an association being identified directly correlated with its clinical

234 relevance. In a previous Malawian GWAS where no pneumococcal meningitis-related OGs were  
235 identified, not only the human and pneumococcal population differed from ours,<sup>28</sup> also the heavy  
236 selection for meningitis cases could have altered the relative contribution of certain pneumococcal  
237 variants.<sup>29</sup> Vice versa, a determinant identified from an artificial distribution of cases (with unnatural pre-  
238 odds), may no longer be valid among patient populations presenting to the hospital.

239  
240 In general, pneumococcal population structures are characterized by linkage disequilibrium, which  
241 means that particular groups of sequences (including the capsular sequence variant) co-occur together  
242 on a pneumococcal genome. In our GWAS analyses, to prevent identification of sequences that actually  
243 represent a magnitude of co-occurring genes, we corrected for this population structure. Also, we  
244 assessed whether these so-called sequence clusters as a whole were related to clinical IPD phenotypes,  
245 and we found a remarkable concordance to previous serotype-based studies.<sup>30-32</sup>

246 Our exclusion of strain- and lineage-specific effects may explain why we have not identified variants of  
247 single genes that have previously been described to enhance transition from blood to CSF in laboratory  
248 models such as *nanaA*, *cbpA*, *pCho*, *lytA*, *ply*, and *glpO*.<sup>33</sup> At the same time, this aspect of our approach  
249 may have favoured the detection of bacterial genotypes located on prophage vectors to be associated  
250 with clinical phenotypes as found by us and by others previously.<sup>34</sup> Unlike many other genes in clonal  
251 populations, the distribution of bacteriophages is not as strictly determined by lineage. On the other  
252 hand, an important example of a prophage sequence that was associated with the severity of invasive  
253 meningococcal disease was discovered by gene-array without bias from correction for population  
254 structure.<sup>35</sup> In any case, if indeed multiple proteins encoded by prophage elements have meaningful  
255 interactions with human cells during bloodstream infections, it is more likely that this prophage trait was  
256 fixated because of some fitness advantage the bacteriophage or the lysogenic pneumococcus

257 experiences during colonization at the respiratory mucosal surface from where it can actually acquire a  
258 viable host.

259 What we have learned from the k-mer-based GWAS is that the number of lineage-independent allelic  
260 variants present in a pneumococcal IPD population is too high for identification of robust associations  
261 with particular phenotypes at the current sample size. Although one may have expected OG\_17 *pblB*-  
262 fragments to be identified in relation to 30-day mortality, the sequences in this orthologous gene were  
263 too dispersed to meet the k-mer selection and association thresholds. On the other hand, despite all  
264 sequences of OG\_2721 being identical, k-mers originating from OG\_2721 were still included in the SEER  
265 analysis (and positively associated with meningitis), because these k-mers were also represented by a  
266 second OG that was more dissimilar and as such made the k-mer meet the selection criteria. These  
267 examples demonstrate the complementarity of the two different GWAS methods employed.

268  
269 While we identified clinical IPD phenotypes to be associated with pneumococcal genes that were  
270 independent of pneumococcal lineage (serotype) and clinical predictors, this does not prove causality.  
271 We have not included potential confounders like host genotype, a host factor that mediates  
272 susceptibility to meningitis<sup>36</sup> and may simultaneously induce a mucosal environment that welcomes  
273 specific pneumococcal variants. On the other hand, evidence for a direct effect of pneumococcal variants  
274 in the human bloodstream was demonstrated by measurement of increased activation of human  
275 platelets upon interaction with a *pblB*-positive *S. pneumoniae* compared to its knock out variant.<sup>22</sup> The  
276 predicted function of the protein encoded by the *pblB* gene (e.i. functional annotation based on  
277 homology) is a phage tail fiber, and its *S. mitis* orthologue was shown to bind to human platelets as  
278 well.<sup>37</sup> Although we have studied pneumococcal blood isolates, it has been shown based on genomic  
279 data no adaptation is needed to cross the blood-brain barrier, so DNA sequences from blood isolates  
280 seem representative for pneumococci that reach the cerebrospinal fluid and cause meningitis.<sup>38</sup> Human

281 phospholipase A2, encoded by *slaA*, has been shown to reduce the integrity of the blood-brain barrier *in*  
282 *vitro*, thereby mediating penetration of endothelial cells by group B *Streptococcus*.<sup>39</sup> In group A  
283 *Streptococcus* the presence of *slaA* enhanced the bacterium's potential for epithelial adherence,  
284 colonization and invasive disease.<sup>40</sup> Also for *slaA* further studies would be required to elucidate its  
285 effects *in vivo* and possibilities to avert these during disease. Furthermore, recent advancements in  
286 methods to study functional interactions on pneumococcal genomes<sup>41,42</sup> may help to improve our  
287 understanding of why particular sequence clusters are overrepresented in certain phenotypes.

288  
289 This study provides evidence that it does matter which pneumococcal variant proliferates in the  
290 bloodstream, as it improves our risk assessment in patients affected by IPD. This suggests that the  
291 established value of microbial genomics in public health,<sup>43</sup> outbreak management and combating  
292 antimicrobial resistance,<sup>44</sup> may now be extended to individual patient care. Increased appreciation of  
293 eliciting microbial variants, could push the tailored adjunctive measures that are heavily searched for in  
294 clinical sepsis care.<sup>45</sup>

295 Because population dynamics are likely to affect their relative importance, the mapping of microbial  
296 variants of concern needs to be supported by strong interdisciplinary surveillance networks. While a  
297 systems biology approach may unravel the exact pathophysiology, prompt molecular diagnostics at the  
298 emergency department could readily improve risk stratification and alertness for complicated infection  
299 in individual patient care.<sup>46</sup>



300 **References**

301

1. Weiser JN. The pneumococcus: why a commensal misbehaves. *J Mol Med (Berl)* 2010; **88**(2): 97-102.
2. O'Brien KL, Wolfson LJ, Watt JP, et al. Burden of disease caused by *Streptococcus pneumoniae* in children younger than 5 years: global estimates. *Lancet* 2009; **374**(9693): 893-902.
3. Wunderink RG. CAP death: what goes wrong when everything is right? *Lancet Infect Dis* 2015; **15**(9): 995-6.
4. Picard C, Puel A, Bustamante J, Ku CL, Casanova JL. Primary immunodeficiencies associated with pneumococcal disease. *Curr Opin Allergy Clin Immunol* 2003; **3**(6): 451-9.
5. van der Poll T, Opal SM. Pathogenesis, treatment, and prevention of pneumococcal pneumonia. *Lancet* 2009; **374**(9700): 1543-56.
6. Mook-Kanamori BB, Geldhoff M, van der Poll T, van de Beek D. Pathogenesis and pathophysiology of pneumococcal meningitis. *Clin Microbiol Rev* 2011; **24**(3): 557-91.
7. Brueggemann AB, Griffiths DT, Meats E, Peto T, Crook DW, Spratt BG. Clonal relationships between invasive and carriage *Streptococcus pneumoniae* and serotype- and clone-specific differences in invasive disease potential. *J Infect Dis* 2003; **187**(9): 1424-32.
8. Browall S, Backhaus E, Naucner P, et al. Clinical manifestations of invasive pneumococcal disease by vaccine and non-vaccine types. *Eur Respir J* 2014; **44**(6): 1646-57.
9. Miller E, Andrews NJ, Waight PA, Slack MP, George RC. Herd immunity and serotype replacement 4 years after seven-valent pneumococcal conjugate vaccination in England and Wales: an observational cohort study. *Lancet Infect Dis* 2011; **11**(10): 760-8.
10. Cremers AJ, Mobegi FM, de Jonge MI, et al. The post-vaccine microevolution of invasive *Streptococcus pneumoniae*. *Sci Rep* 2015; **5**: 14952.
11. Cilloniz C, Gabarrus A, Almirall J, et al. Bacteraemia in outpatients with community-acquired pneumonia. *Eur Respir J* 2016; **47**(2): 654-7.
12. Thigpen MC, Whitney CG, Messonnier NE, et al. Bacterial meningitis in the United States, 1998-2007. *N Engl J Med* 2011; **364**(21): 2016-25.
13. Billings ME, Deloria-Knoll M, O'Brien KL. Global Burden of Neonatal Invasive Pneumococcal Disease: A Systematic Review and Meta-analysis. *Pediatr Infect Dis J* 2016; **35**(2): 172-9.
14. McGill F, Heyderman RS, Panagiotou S, Tunkel AR, Solomon T. Acute bacterial meningitis in adults. *Lancet* 2016; **388**(10063): 3036-47.
15. Croucher NJ, Harris SR, Fraser C, et al. Rapid pneumococcal evolution in response to clinical interventions. *Science* 2011; **331**(6016): 430-4.
16. Hausdorff WP, Feikin DR, Klugman KP. Epidemiological differences among pneumococcal serotypes. *Lancet Infect Dis* 2005; **5**(2): 83-93.
17. Netherlands Reference Laboratory for Bacterial Meningitis (AMC/RIVM). URL: <https://www.amc.nl/web/Research/Overview/Departments/Medical-Microbiology/Medical-Microbiology/Current-research/Reference-Laboratory-for-Bacterial-Meningitis.htm?print=true>, accessed 24/07/2017.
18. Wagenvoort GH, Sanders EA, Vlamincx BJ, et al. Invasive pneumococcal disease: Clinical outcomes and patient characteristics 2-6 years after introduction of 7-valent pneumococcal conjugate vaccine compared to the pre-vaccine period, the Netherlands. *Vaccine* 2016; **34**(8): 1077-85.
19. Purcell S, Neale B, Todd-Brown K, et al. PLINK: a tool set for whole-genome association and population-based linkage analyses. *Am J Hum Genet* 2007; **81**(3): 559-75.

20. Lees JA, Vehkala M, Valimaki N, et al. Sequence element enrichment analysis to determine the genetic basis of bacterial phenotypes. *Nat Commun* 2016; **7**: 12797.
21. Arndt D, Grant JR, Marcu A, et al. PHASTER: a better, faster version of the PHAST phage search tool. *Nucleic Acids Res* 2016; **44**(W1): W16-21.
22. Tunjungputri RN, Mobegi FM, Cremers AJ, et al. Phage-Derived Protein Induces Increased Platelet Activation and Is Associated with Mortality in Patients with Invasive Pneumococcal Disease. *MBio* 2017; **8**(1).
23. Cremers AJ, Hagen F, Hermans PW, Meis JF, Ferwerda G. Diagnostic value of serum pneumococcal DNA load during invasive pneumococcal infections. *Eur J Clin Microbiol Infect Dis* 2014; **33**(7): 1119-24.
24. Elberse K, van Mens S, Cremers AJ, et al. Detection and serotyping of pneumococci in community acquired pneumonia patients without culture using blood and urine samples. *BMC Infect Dis* 2015; **15**: 56.
25. Aston SJ, Rylance J. Community-Acquired Pneumonia in Sub-Saharan Africa. *Semin Respir Crit Care Med* 2016; **37**(6): 855-67.
26. Carter R, Wolf J, van Opijnen T, et al. Genomic analyses of pneumococci from children with sickle cell disease expose host-specific bacterial adaptations and deficits in current interventions. *Cell Host Microbe* 2014; **15**(5): 587-99.
27. Hausdorff WP, Hanage WP. Interim results of an ecological experiment - Conjugate vaccination against the pneumococcus and serotype replacement. *Hum Vaccin Immunother* 2016; **12**(2): 358-74.
28. Everett DB, Cornick J, Denis B, et al. Genetic characterisation of Malawian pneumococci prior to the roll-out of the PCV13 vaccine using a high-throughput whole genome sequencing approach. *PLoS One* 2012; **7**(9): e44250.
29. Kulohoma BW, Cornick JE, Chaguza C, et al. Comparative Genomic Analysis of Meningitis- and Bacteremia-Causing Pneumococci Identifies a Common Core Genome. *Infect Immun* 2015; **83**(10): 4165-73.
30. Lujan M, Gallego M, Belmonte Y, et al. Influence of pneumococcal serotype group on outcome in adults with bacteraemic pneumonia. *Eur Respir J* 2010; **36**(5): 1073-9.
31. Weinberger DM, Harboe ZB, Sanders EA, et al. Association of serotype with risk of death due to pneumococcal pneumonia: a meta-analysis. *Clin Infect Dis* 2010; **51**(6): 692-9.
32. Fletcher MA, Schmitt HJ, Syrochkina M, Sylvester G. Pneumococcal empyema and complicated pneumonias: global trends in incidence, prevalence, and serotype epidemiology. *Eur J Clin Microbiol Infect Dis* 2014; **33**(6): 879-910.
33. Brown JM, Hammerschmidt S, Orihuela C. *Streptococcus pneumoniae* Molecular Mechanisms of Host-Pathogen Interactions. Elsevier inc. 2015 USA. Chapter 23 Pneumococcal Invasion: Development of Bacteremia and Meningitis; Gratz N, Loh LN, Tuomanen E; 433-451.
34. Kremer PH, Lees JA, Koopmans MM, et al. Benzalkonium tolerance genes and outcome in *Listeria monocytogenes* meningitis. *Clin Microbiol Infect* 2016.
35. Bille E, Ure R, Gray SJ, et al. Association of a bacteriophage with meningococcal disease in young adults. *PLoS One* 2008; **3**(12): e3885.
36. Kloek AT, van Setten J, van der Ende A, et al. Exome Array Analysis of Susceptibility to Pneumococcal Meningitis. *Sci Rep* 2016; **6**: 29351.
37. Bensing BA, Rubens CE, Sullam PM. Genetic loci of *Streptococcus mitis* that mediate binding to human platelets. *Infect Immun* 2001; **69**(3): 1373-80.
38. Lees JA, Kremer PH, Manso AS, et al. Large scale genomic analysis shows no evidence for pathogen adaptation between the blood and cerebrospinal fluid niches during bacterial meningitis. *Microb Genom* 2017; **3**(1): e000103.

39. Maruvada R, Zhu L, Pearce D, Sapirstein A, Kim KS. Host cytosolic phospholipase A(2)alpha contributes to group B *Streptococcus* penetration of the blood-brain barrier. *Infect Immun* 2011; **79**(10): 4088-93.
40. Sitkiewicz I, Nagiec MJ, Sumbly P, Butler SD, Cywes-Bentley C, Musser JM. Emergence of a bacterial clone with enhanced virulence by acquisition of a phage encoding a secreted phospholipase A2. *Proc Natl Acad Sci U S A* 2006; **103**(43): 16009-14.
41. van Opijnen T, Lazinski DW, Camilli A. Genome-Wide Fitness and Genetic Interactions Determined by Tn-seq, a High-Throughput Massively Parallel Sequencing Method for Microorganisms. *Curr Protoc Microbiol* 2015; **36**: 1E 3 1-24.
42. Skwark MJ, Croucher NJ, Puranen S, et al. Interacting networks of resistance, virulence and core machinery genes identified by genome-wide epistasis analysis. *PLoS Genet* 2017; **13**(2): e1006508.
43. Grad YH, Lipsitch M. Epidemiologic data and pathogen genome sequences: a powerful synergy for public health. *Genome Biol* 2014; **15**(11): 538.
44. Li Y, Metcalf BJ, Chochua S, et al. Penicillin-Binding Protein Transpeptidase Signatures for Tracking and Predicting beta-Lactam Resistance Levels in *Streptococcus pneumoniae*. *MBio* 2016; **7**(3).
45. Cohen J, Vincent JL, Adhikari NK, et al. Sepsis: a roadmap for future research. *Lancet Infect Dis* 2015; **15**(5): 581-614.
46. Peacock S. Health care: Bring microbial sequencing to hospitals. *Nature* 2014; **509**(7502): 557-9.

302 **Acknowledgements**

303 We thank Dr. A. van der Ende at the Reference Laboratory for Bacterial Meningitis and all hospitals  
304 involved in the Dutch national surveillance programme for their concerted efforts which made it possible  
305 to validate our findings.

306

307 **Declaration of interests**

308 All authors declare to have no conflicts of interest.

309 **Tables**

310

311 **Table 1** Sequence cluster as determinant of clinical IPD phenotype in the index cohort

| Phenotype                      | SC   | $\beta$ -coefficient | OR  | 95% CI         | p-value |
|--------------------------------|------|----------------------|-----|----------------|---------|
| <b>Host specificity</b>        |      |                      |     |                |         |
| Age                            | SC10 | -14,1                |     | -21,0 - -7,3   | <0,001  |
|                                | SC9  | -11,7                |     | -18,1 - -5,3   | <0,001  |
|                                | NA   | -7,9                 |     | -12,9 - -2,9   | 0,002   |
|                                | SC8  | -12,8                |     | -22,9 - -2,8   | 0,012   |
| Male                           | SC1  |                      | 0,2 | 0,1 - 0,7      | 0,013   |
| Charlson comorbidity score     | SC10 | -1,6                 |     | -2,5 - -0,7    | 0,001   |
|                                | SC9  | -1,3                 |     | -2,1 - -0,4    | 0,003   |
| COPD                           | SC4  |                      | <<  |                |         |
|                                | SC5  |                      | 0,1 | 0,0 - 1,1      | 0,058   |
| Diabetes mellitus              | SC1  |                      | 3,0 | 1,1 - 8,1      | 0,025   |
| Cancer                         | SC4  |                      | 4,1 | 1,3 - 12,6     | 0,014   |
|                                | SC9  |                      | 0,2 | 0,0 - 0,8      | 0,027   |
| Immunocompromising therapy     | SC10 |                      | <<  |                |         |
| Cardiovascular disease         | SC1  |                      | 4,0 | 1,4 - 11,5     | 0,009   |
| Antibiotics prior to admission | NA   |                      | 3,4 | 1,0 - 11,4     | 0,050   |
| Influenza season               | None |                      |     |                |         |
| Year of infection              | SC7  | -1,4                 |     | -2,7 - -0,1    | 0,037   |
| <b>Presentation</b>            |      |                      |     |                |         |
| SIRS                           | SC3  |                      | >>  |                |         |
|                                | SC6  |                      | 6,2 | 0,8 - 46,8     | 0,076   |
| Cough                          | SC11 |                      | 0,3 | 0,1 - 0,9      | 0,037   |
| CRP                            | NA   | -71,8                |     | -116,9 - -26,6 | 0,002   |
|                                | SC12 | -101,2               |     | -185,1 - -17,2 | 0,018   |
|                                | SC10 | 73,2                 |     | 11,0 - 135,4   | 0,021   |
| Leukocytes                     | SC5  | -5,4                 |     | -9,7 - -1,1    | 0,015   |
|                                | SC4  | 5,9                  |     | 0,3 - 11,5     | 0,041   |
| Pneumonia                      | NA   |                      | 0,5 | 0,3 - 0,9      | 0,015   |
|                                | SC6  |                      | 4,6 | 1,1 - 19,9     | 0,042   |
|                                | SC8  |                      | >>  |                |         |
|                                | SC10 |                      | 7,5 | 1,0 - 56,9     | 0,050   |
| PSI risk class                 | SC10 | -1,1                 |     | -1,4 - -0,7    | <0,001  |
|                                | SC9  | -0,9                 |     | -1,3 - -0,5    | <0,001  |
| Pleural effusion               | NA   |                      | 0,5 | 0,2 - 0,9      | 0,022   |
| Empyema                        | None |                      |     |                |         |
| Meningitis                     | NA   |                      | 6,0 | 2,6 - 14,1     | <0,001  |
|                                | SC9  |                      | 3,5 | 1,1 - 10,8     | 0,032   |
| Unknown focus of infection     | SC6  |                      | <<  |                |         |
|                                | SC10 |                      | <<  |                |         |
| <b>Course</b>                  |      |                      |     |                |         |
| 30-day mortality               | SC4  |                      | <<  |                |         |
|                                | SC8  |                      | <<  |                |         |
|                                | SC9  |                      | 0,2 | 0,0 - 1,2      | 0,080   |
|                                | SC10 |                      | 0,2 | 0,0 - 1,4      | 0,108   |
| Early death                    | None |                      |     |                |         |

312 >> / <<: all / none of the cases assigned this sequence cluster displayed the phenotype.

313 Abbreviations: IPD: invasive pneumococcal disease; SC: sequence cluster; OR: odds ratio; 95%-CI: 95% confidence interval; NA:

314 assembly of strains not assigned to a particular sequence cluster; COPD: chronic obstructive pulmonary disease; SIRS: systemic

315 inflammatory response syndrome; PSI: pneumonia severity index.

316

317 Table 2 Optimized prediction models for meningitis and 30-day mortality

| Phenotype                                     | Determinant                | OR   | 95% CI       | p-value |
|-----------------------------------------------|----------------------------|------|--------------|---------|
| <b>Meningitis</b>                             | Cough                      | 0.06 | 0.02 - 0.22  | 8.6E-6  |
|                                               | OG_2721 <i>slaA</i>        | 10.5 | 2.61 - 42.30 | 0.001   |
|                                               | Age                        | 0.97 | 0.94 - 0.99  | 0.006   |
|                                               | SC9 (serotype 7F)          | 3.68 | 0.96 - 14.05 | 0.057   |
| <b>30-day mortality</b>                       | Charlson comorbidity score | 1.46 | 1.24 - 1.72  | 7.0E-4  |
|                                               | OG_17 <i>pblB</i>          | 3.40 | 1.53 - 7.59  | 0.003   |
|                                               | Meningitis                 | 4.61 | 1.55 - 13.74 | 0.006   |
|                                               | Charlson comorbidity score | 1.34 | 1.06 - 1.68  | 0.013   |
| <b>30-day mortality among pneumonia cases</b> | OG_17 <i>pblB</i>          | 3.28 | 1.18 - 9.11  | 0.023   |
|                                               | PSI risk class             | 2.22 | 1.07 - 4.63  | 0.033   |

318 Sequence clusters 9 and 10 made no relative contribution to the models for 30-day mortality.

319 Abbreviations: OR: odds ratio; 95% CI: 95% confidence interval; OG: orthologous gene; SC: sequence cluster; PSI: pneumonia

320 severity index.

321

322 Table 3 Detection of orthologous gene sequences in serum from IPD patients

| Study ID                                | PBCN0382                                     | PBCN0389 | PBCN0420 | PBCN0480 | PBCN0442 |
|-----------------------------------------|----------------------------------------------|----------|----------|----------|----------|
| Meningitis                              | yes                                          | no       | no       | yes      | no       |
| 30-day mortality                        | no                                           | yes      | yes      | yes      | no       |
| Serum pneumococcal DNA load (copies/ml) | 8E+02                                        | 7E+03    | 3E+03    | 3E+03    | 1E+04    |
| <b>OG_2721</b> <i>slaA</i>              | Isolate whole genome sequencing <sup>a</sup> | 1        | 0        | 0        | 0        |
|                                         | Serum OG-PCR <sup>b</sup>                    | 2        | 0        | 0        | 0        |
| <b>OG_17</b> <i>pblB</i>                | Isolate whole genome sequencing              | 2        | 1        | 1        | 0        |
|                                         | Serum OG-PCR                                 | 2        | 2        | 1        | 0        |
| <b>OG_675</b>                           | Isolate whole genome sequencing              | 2        | 1        | 1        | 0        |
|                                         | Serum OG-PCR                                 | 2        | 1        | 2        | 0        |
| <b>OG_58</b>                            | Isolate whole genome sequencing              | 2        | 1        | 1        | 0        |
|                                         | Serum OG-PCR                                 | 2        | 2        | 2        | 2        |
| <b>Prophage sequence</b>                | Isolate whole genome sequencing              | partial  | partial  | complete | partial  |

323 The results in the matrix represent: <sup>a</sup> number of open reading frames assigned; <sup>b</sup> times target detected in duplicate OG-PCRs.

324 Abbreviations: IPD: invasive pneumococcal disease; ID: identifier; PBCN: pneumococcal bacteraemia collection Nijmegen; OG:

325 orthologous gene; OG-PCR: orthologous gene polymerase chain reaction.

326 **Figure legends**

327

328 Figure 1 Cohort characteristics.

329 The index cohort consisted of 349 patients with a pneumococcal bacteraemia admitted to 2 local  
330 hospitals (H), the geographical validation cohort of 482 patients in nationwide IPD surveillance, and the  
331 temporal validation cohort of 121 patients admitted to the index hospitals during a later time period  
332 (panel A). Main cohort characteristics are presented as mean  $\pm$  standard deviation, median (interquartile  
333 range), or percentage fulfilling the condition (N/N known) (panel B).

334 \*:p<0.05; \*\*:p<0.01; \*\*\*:p<0.001.

335 *Abbreviations:* PSI: pneumonia severity index; PCV7: serotypes 4, 6B, 9V, 14, 18, and 23F; PCV10: serotypes 1, 5, and 7F; PCV13:  
336 serotypes 3, 6A, and 19A; NVT: all other (non vaccine) serotypes.

337 P-values support differences from the index cohort.

338

339 Figure 2 Clinical IPD phenotypes with associated orthologous pneumococcal genes in index cohort.

340 Rows represent 349 IPD cases and corresponding pneumococcal blood isolates. The tree on the left  
341 represents their relative phylogenetic position based on SNPs in the core genome, in which sequence  
342 clusters are highlighted. The columns represent the presence (filled) or absence (empty) of clinical IPD  
343 phenotypes and their associated pneumococcal orthologous genes (OGs) with annotation at the top.  
344 Maximally 4 associated OGs that passed Fisher's exact with  $p < 0.01$  and were independent of population  
345 structure are displayed. The OGs selected for validation are indicated by an arrow.

346 *Abbreviations:* IPD: invasive pneumococcal disease; OG: orthologous gene; SC: sequence cluster.

347

348 Figure 3 Geographical and temporal validation of orthologous gene associations.

349 The prevalence of pneumococcal OGs in the 3 cohorts (panel A). The association between absence (-,  
350 empty bar) or presence (+, filled bar) of and OG and the proportion of patients affected by a particular

351 IPD phenotype in the index and 2 validation cohorts (cancer: panel B; meningitis: panel C; pneumonia:  
352 panel D; 30-day mortality: panel E).

353 \*:p<0.1; \*\*:p<0.01; \*\*\*:p<0.001.

354 *Abbreviations:* OG: orthologous gene; IPD: invasive pneumococcal disease.

355 P-values indicate differences in the proportion of patients affected by a particular IPD phenotype.

356

357 Figure 4 Co-occurrence of mortality-related orthologous genes on single prophage.

358 A. The level of co-occurrence of 3 pneumococcal OGs is expressed in phi coefficient (in bold) for the

359 index, geographical, and temporal cohort (from left to right). B. Gene card depicting an example of the

360 co-localisation of 4 OGs associated with 30-day mortality on a single prophage in pneumococcal isolate

361 PBCN0420.

362 *Abbreviations:* OG: orthologous gene; PBCN: pneumococcal bacteraemia collection Nijmegen; kbp: kilobase pair.



Index cohort  
n = 349

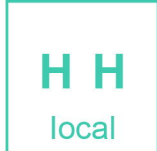

Geographical  
validation cohort  
n = 482

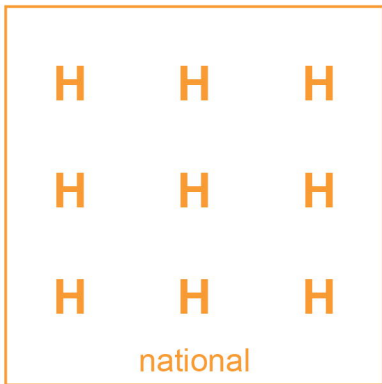

Temporal  
validation cohort  
n = 121

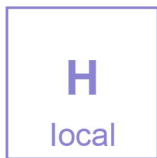

2000 - 2012

2012 - 2016

## Patients

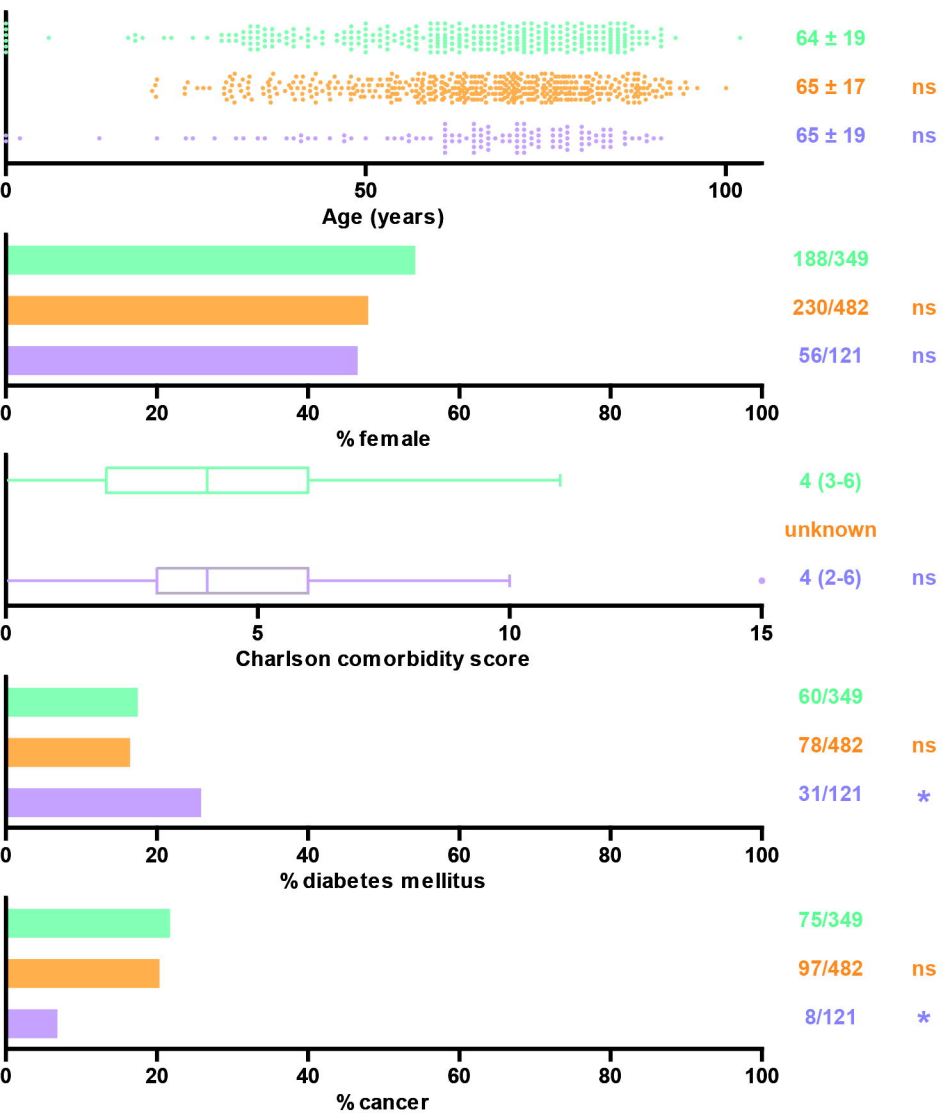

## Clinical presentation

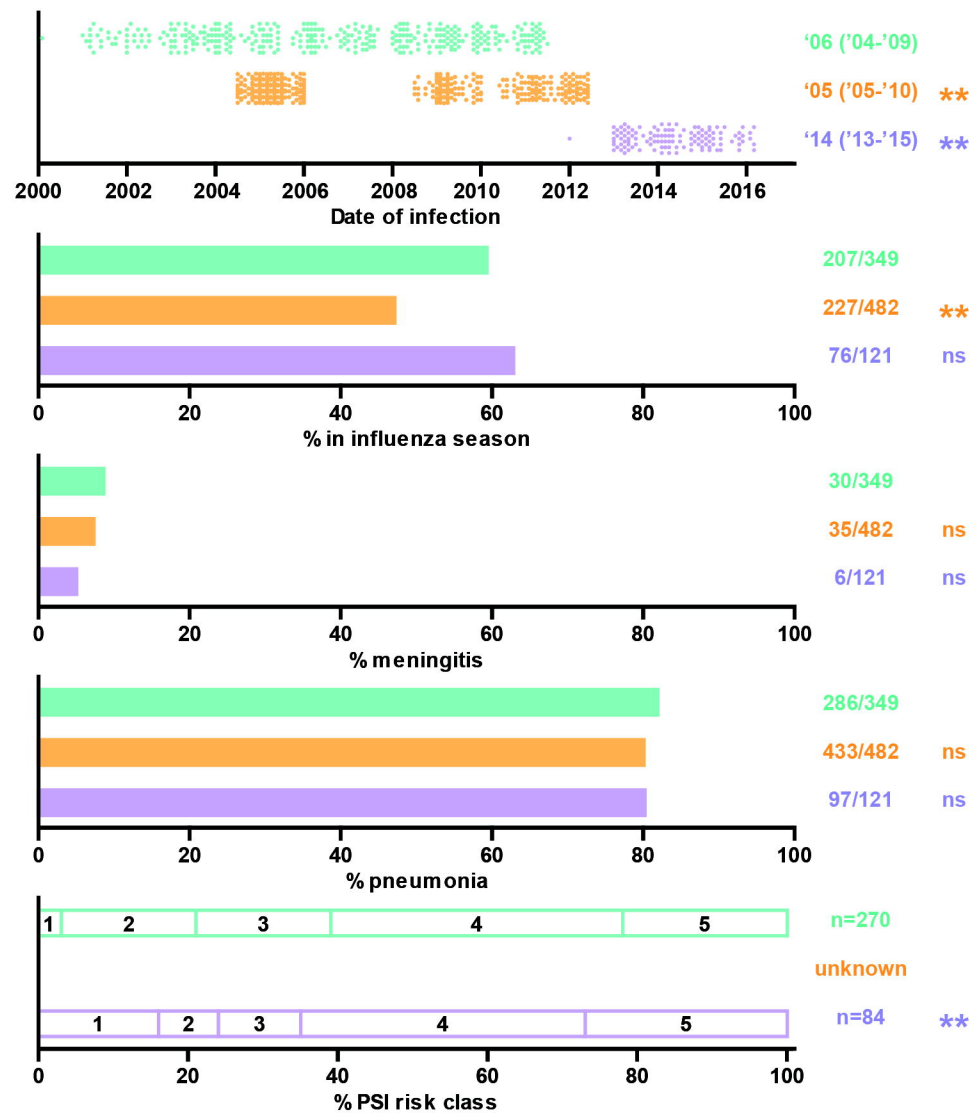

## Clinical outcome

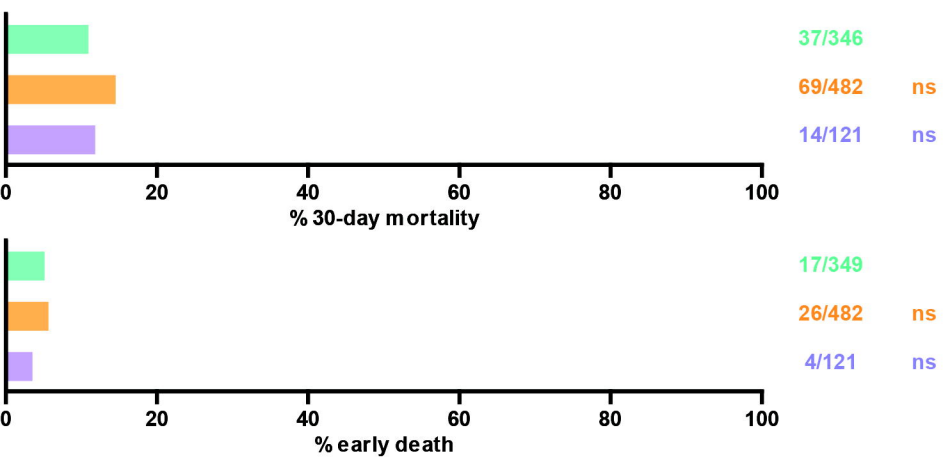

## Pneumococcal isolates

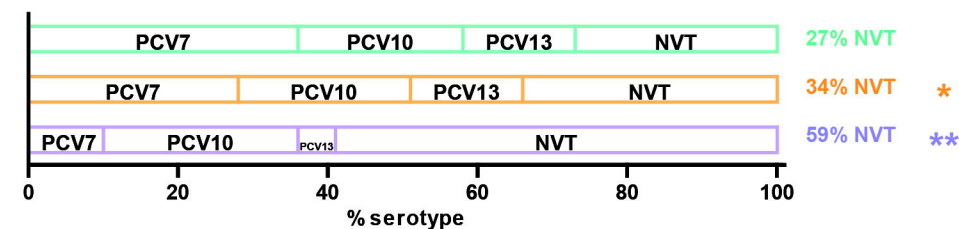

→ Presence of phenotypes and associated orthologous genes

→ IPD cases (isolates) index cohort

**CANCER**  
 OG\_1217 integrase  
 OG\_2048 hypothetical protein  
 OG\_477 permease  
 OG\_1203 purK

**COPD**  
 OG\_360 cbpA  
 OG\_1976 dnaQ/dinG

**INFLUENZA SEASON**

**COUGH**  
 OG\_1921 hypothetical protein  
 OG\_1616 C1-like repressor  
 OG\_2171 type II RM-system  
 OG\_2265 hypothetical protein

**MENINGITIS**  
 OG\_2121 sIaA  
 OG\_2207 hypothetical protein  
 OG\_416 membrane protein  
 OG\_2278 gct

**PNEUMONIA**  
 OG\_2254 abi  
 OG\_2687 phage protein  
 OG\_2278 gct

**EMPHYEMA**  
 OG\_2136 blpO

**PSI RISK CLASS ≥3**  
 OG\_461 methyltransferase  
 OG\_2617 acetyltransferase  
 OG\_1741 hypothetical protein  
 OG\_2376 hypothetical protein

**30-DAY MORTALITY**  
 OG\_17 pbpB  
 OG\_675 hypothetical protein  
 OG\_58 phage protein  
 OG\_175 phage holin

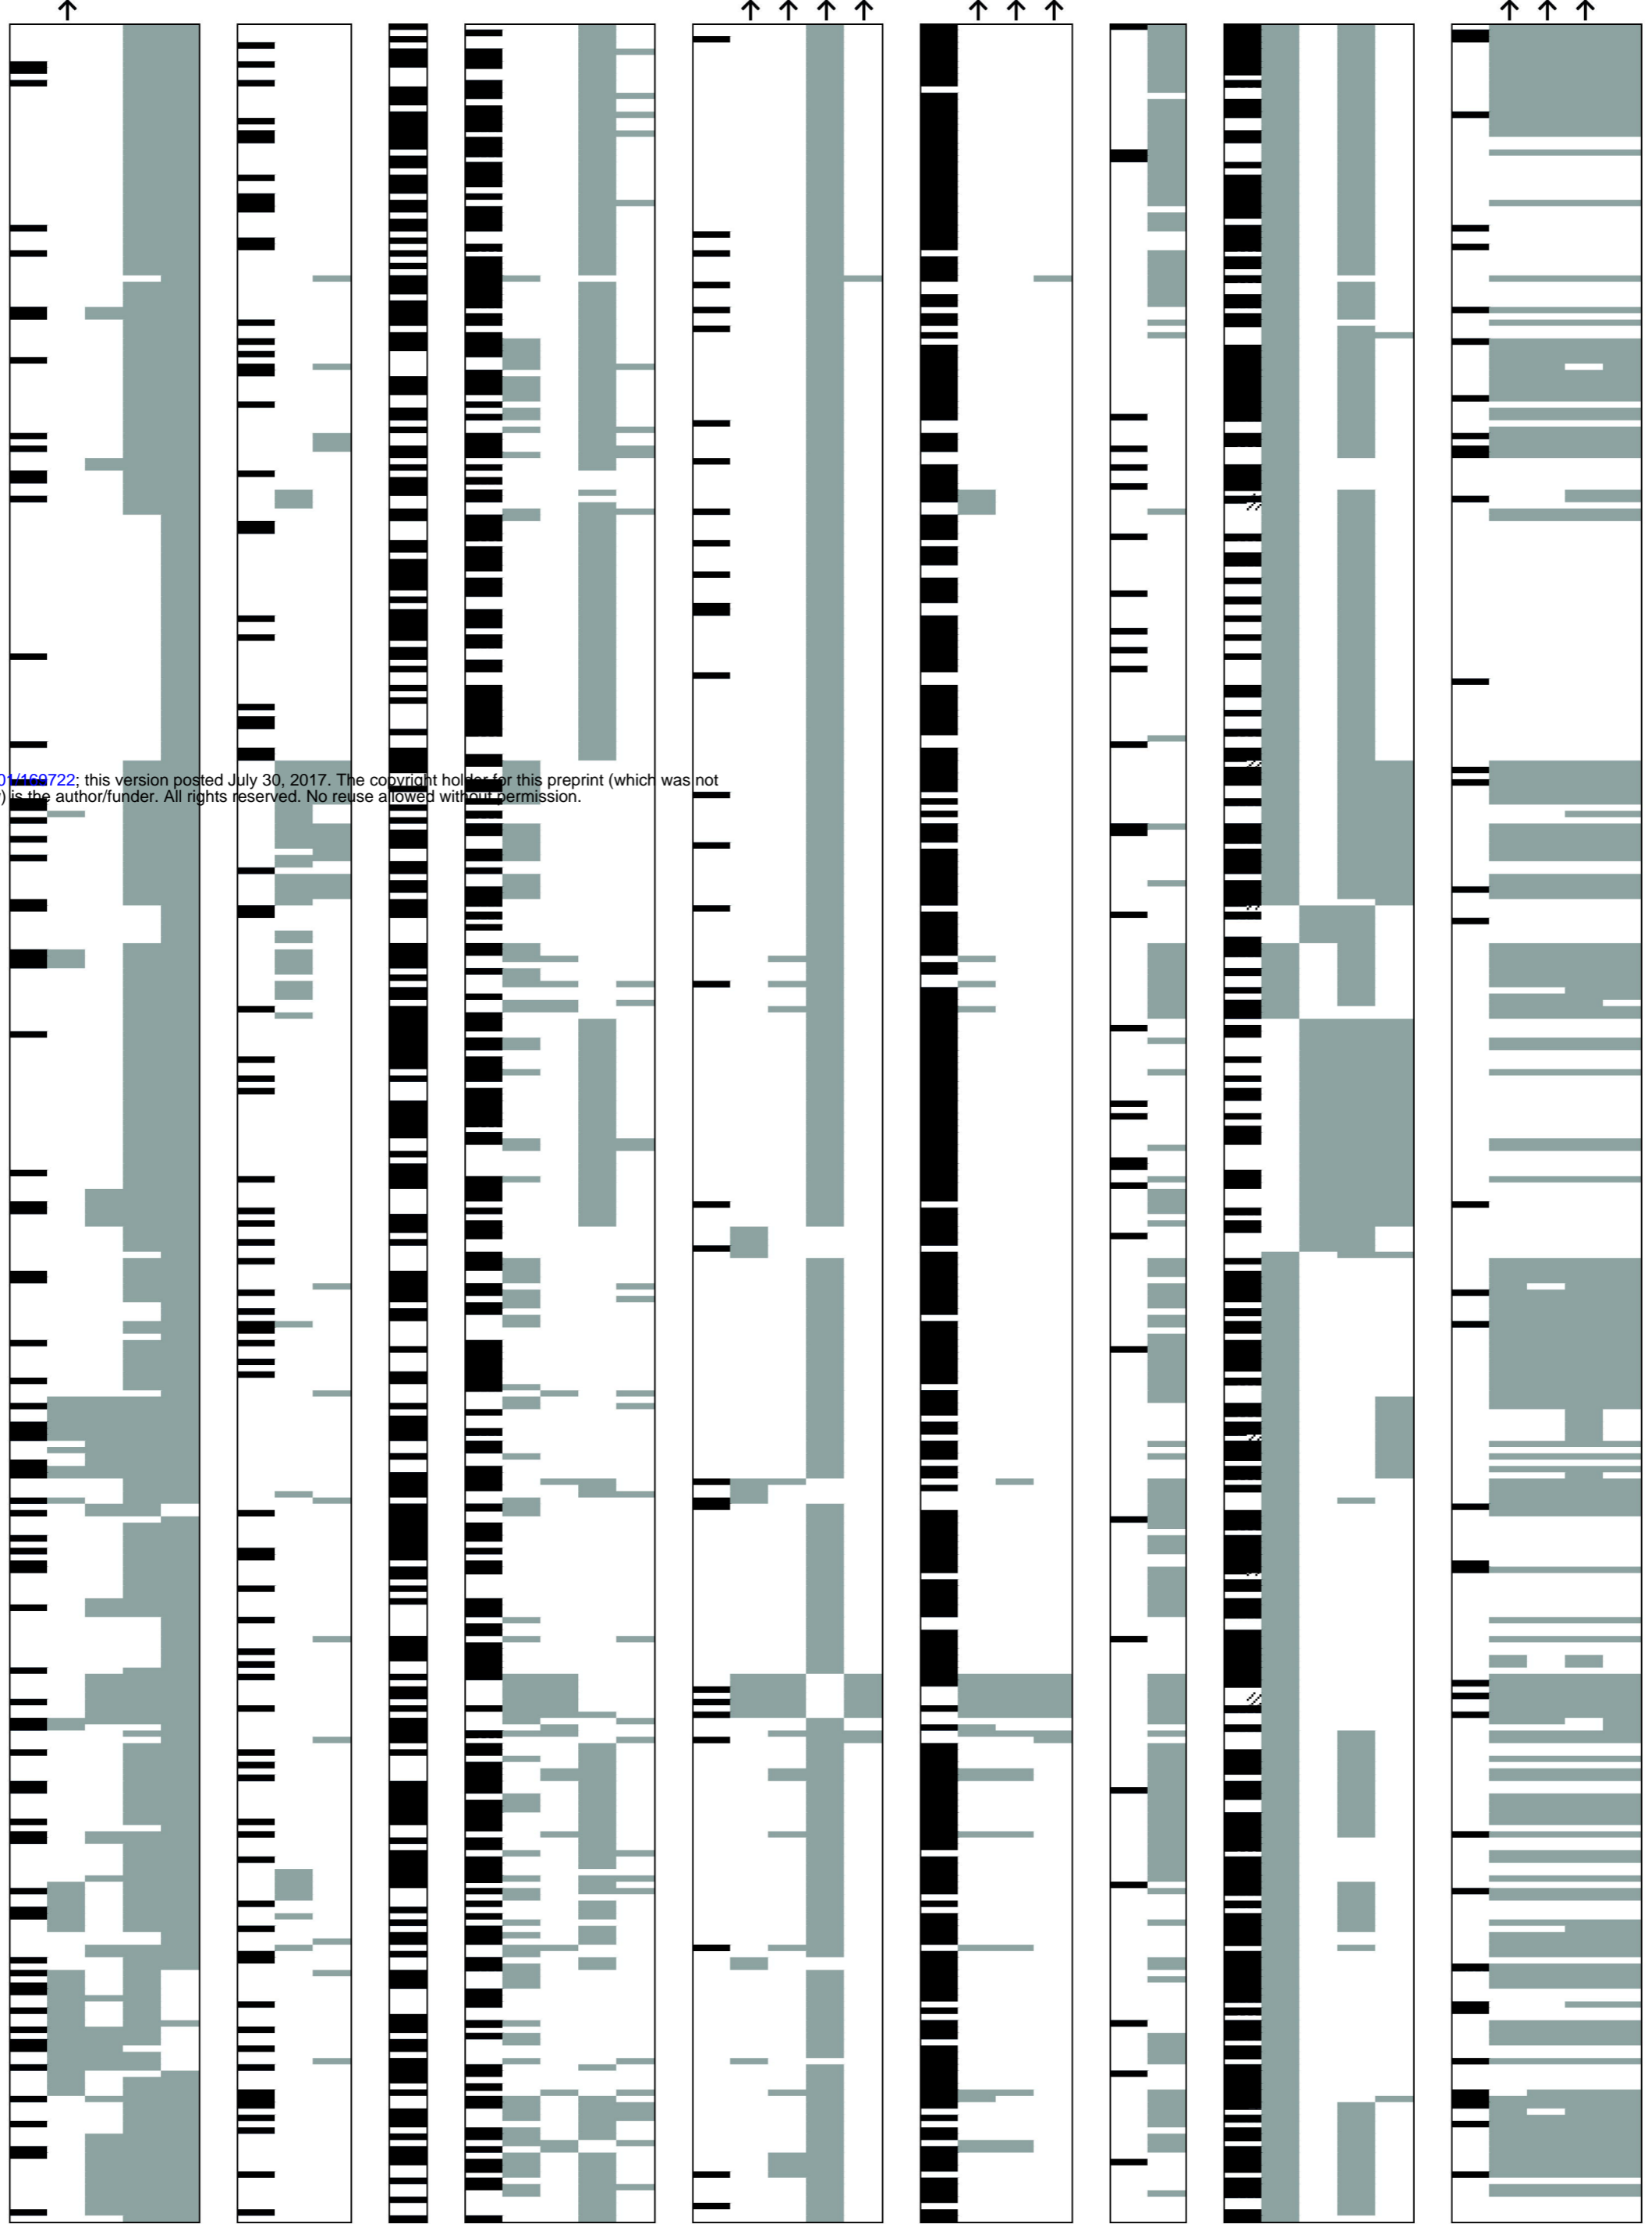

bioRxiv preprint doi: <https://doi.org/10.1101/169722>; this version posted July 30, 2017. The copyright holder for this preprint (which was not certified by peer review) is the author/funder. All rights reserved. No reuse allowed without permission.

**CLINICAL IPD PHENOTYPE**  
 Positively associated OG  
 Negatively associated OG  
 ↑ Selected for validation

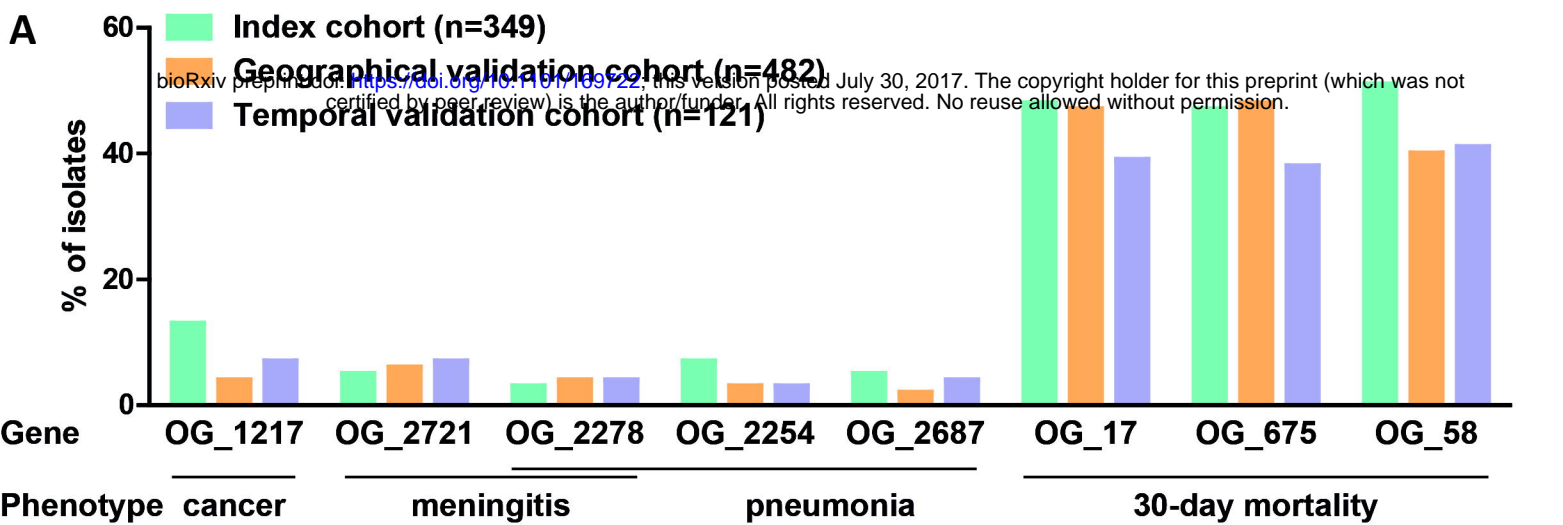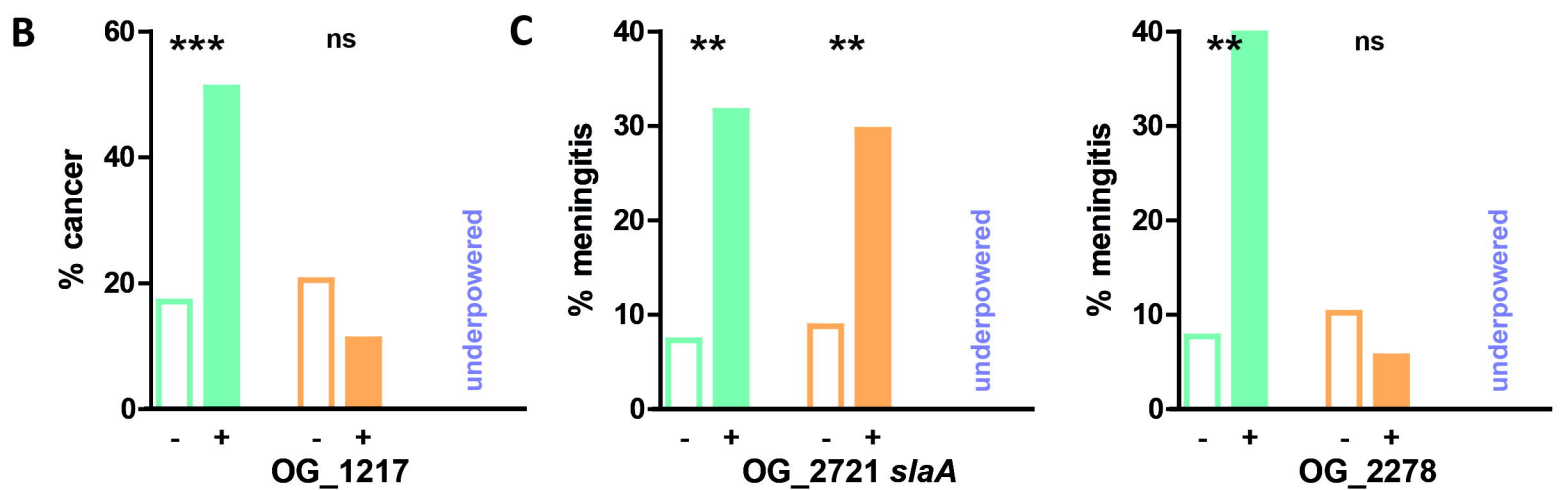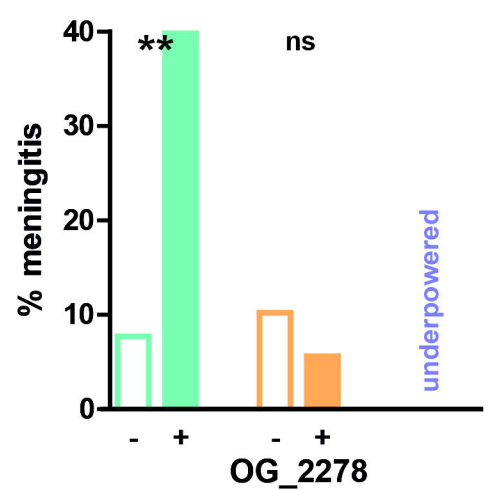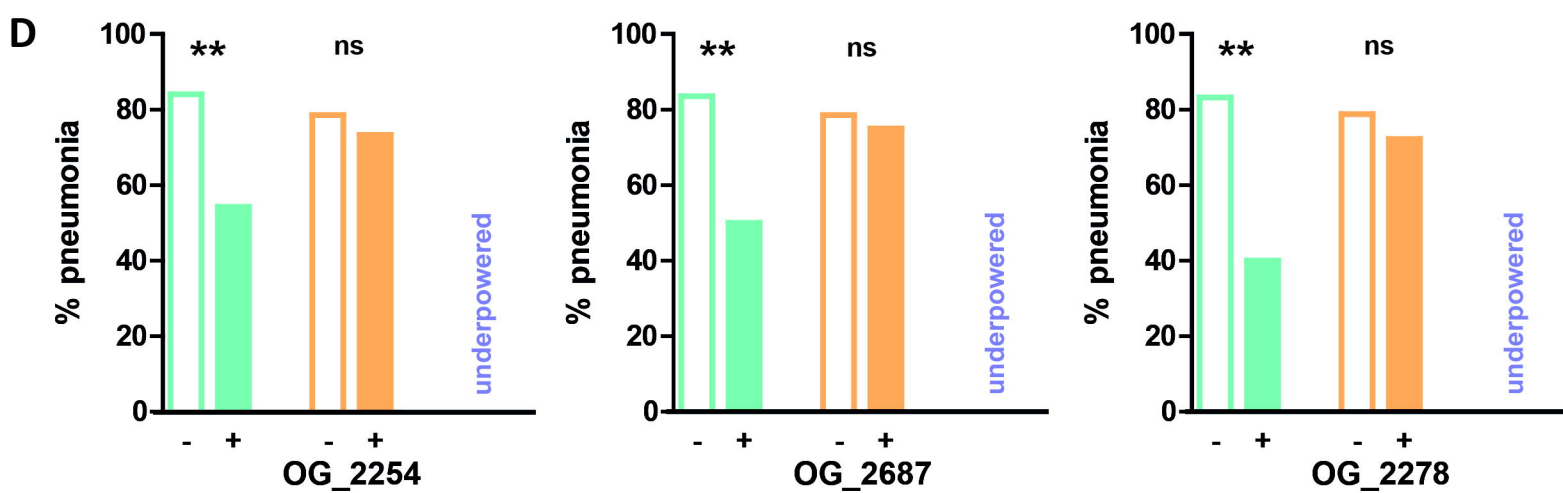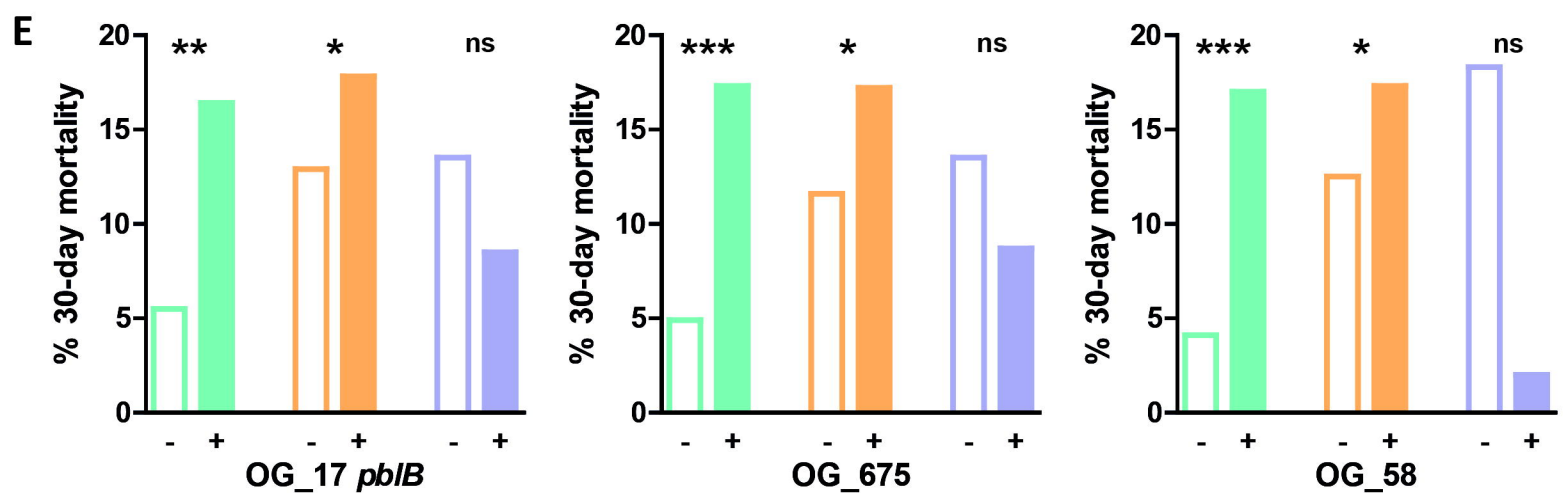

**A**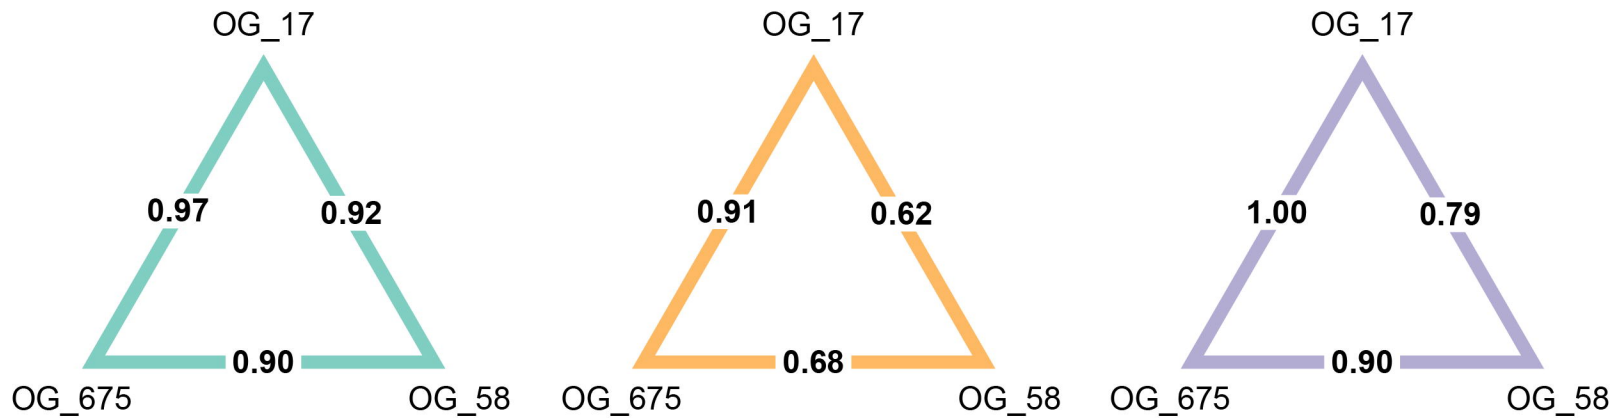**B**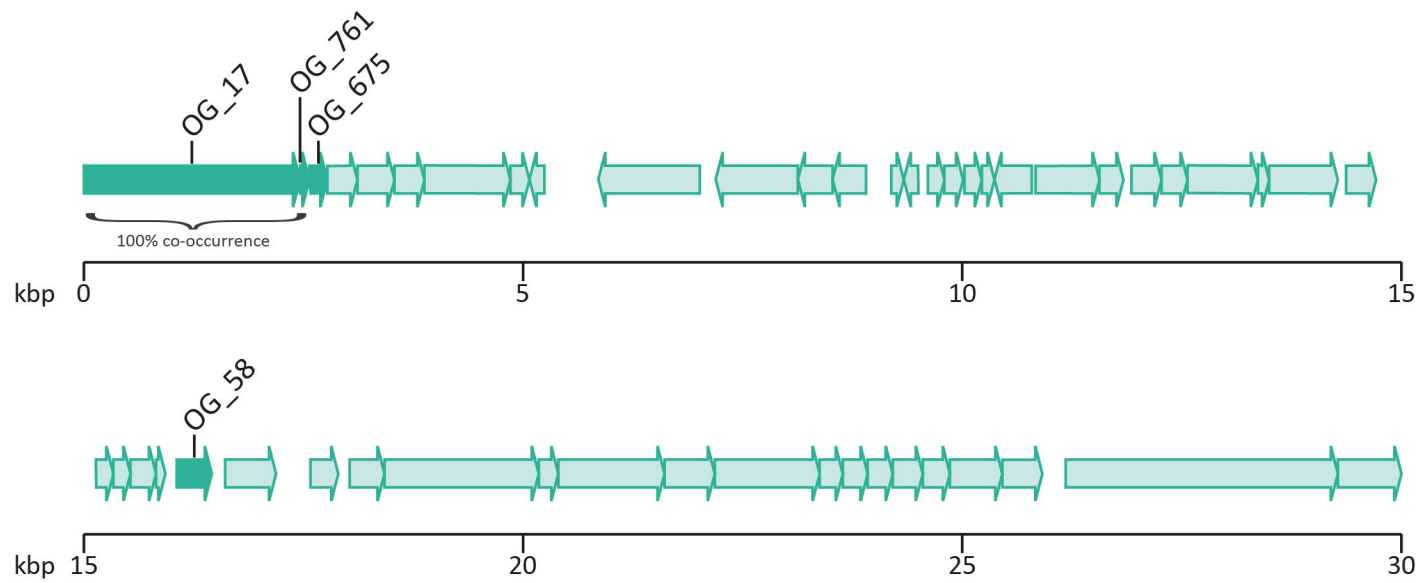

## 1 **Supplementary methods**

2

### 3 Supplementary methods 1 Details in handling of clinical variables

4

#### 5 *Data collection*

6 For all 3 cohorts, clinical data were collected from medical charts and registered with patient identifiers  
7 in a secured source file. In a separate working file, labeled clinical data were stored together with the  
8 non-identifying study code assigned to each IPD case included. The following clinical data were only  
9 collected for patients admitted to the index hospitals: Charlson comorbidity score, COPD, cardiovascular  
10 disease, antibiotics prior to admission, SIRS, blood CRP and leukocyte count, PSI risk class, and time to  
11 death. Otherwise, clinical data were handled in an equal manner across the 3 cohorts.

12

#### 13 *Variables*

14 The following clinical variables were defined, processed or classified in a particular way. Included  
15 invasive pneumococcal disease cases: *S. pneumoniae* isolated from culture of cerebrospinal fluid or  
16 blood. Charlson comorbidity score: calculated for cases  $\geq 18$  years old. Immunocompromising therapy:  
17 actual use of systemic corticosteroids or chemotherapy. Cardiovascular disease: history of either  
18 hypertension, myocardial infarction, myocardial insufficiency, claudicatio intermittens, vasculitis,  
19 vascular stents, heart catheterization, atrial fibrillation or hypercholesterolemia. Antibiotics prior to  
20 admission: within preceding week either in context of separate medical issue or for current infection.  
21 Date of infection: date of blood culture collection. Influenza season: defined annually from the first to  
22 the last week with  $>5$  reported influenza cases in the Netherlands as reported by WHO FluNet  
23 (<http://apps.who.int/flumart/Default?ReportNo=12>). Systemic inflammatory response syndrome:  
24 percentage of immature neutrophils not accounted for. Cough: as reported or observed at admission.

25 Pneumonia, empyema, and meningitis were not mutually exclusive. Pneumonia, meningitis, and  
26 unknown focus of infection: as reported by the attending physician. Pleural effusion: as reported by the  
27 attending radiologist. Empyema: *S. pneumoniae* isolated from pleural fluid culture. CRP, leukocytes, and  
28 other chemistry results included in clinical algorithms: at day of admission, except for bilirubin and  
29 albumin during hospital stay. Pneumonia severity index score: calculated for cases  $\geq 18$  years old who  
30 suffered from pneumonia, formatted into PSI risk class and stratified to PSI risk class 1-2 versus 3-5. 30-  
31 day mortality: in hospital death within 30 days from admission. Early death: in hospital death within 48  
32 hours from admission.

33  
34 *Missing data*  
35 Missing data were not replaced. Data were considered to be missing if the corresponding section was  
36 not present in the medical chart. PSI risk class was only considered valid and reported if  $\geq 16$  included  
37 variables were known. All other clinical algorithms were reported only if missing variables did not  
38 influence case classification.

39 Supplementary methods 2 Interpretation of real time PCR amplification and melting curves

40

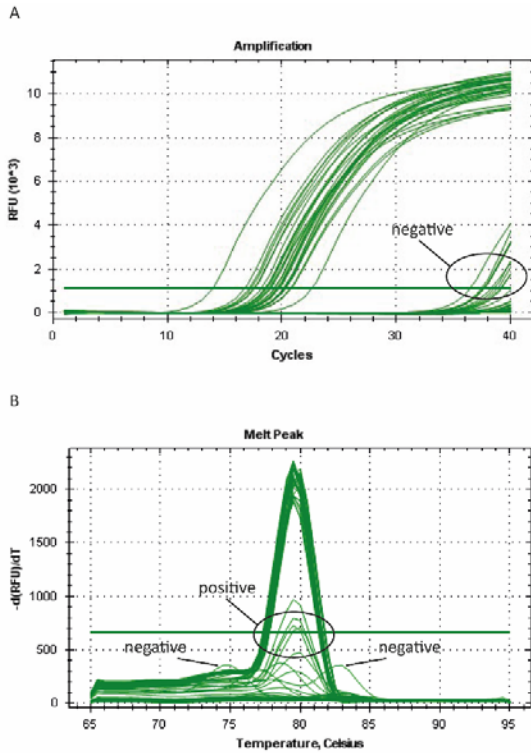

41

42

43

44 Supplementary methods 3 Primer characteristics

| Clinical phenotype | OG         | Name primer pair | Sequence forward primer (5'-3') | Sequence reverse primer (5'-3')                              | Amplicon size (bp)     | MT (°C) | target MT product (°C) | side-product (°C) |
|--------------------|------------|------------------|---------------------------------|--------------------------------------------------------------|------------------------|---------|------------------------|-------------------|
| Cancer             | 1217       | OG_1217          | TGTGGATGGAAGAAGCTCCC            | CCCTTATACCGAGAAATGG                                          | 506                    | 74.5    | 76.5                   |                   |
|                    | Meningitis | 2721             | OG_2721                         | CGTAAACGAGAAATTGTTGAAGAG                                     | CGATTGGAGCTATAGGATGTTG | 443     | 78                     |                   |
|                    |            | 2207             | OG_2207                         | Sequence not compatible with design real time primer pair    |                        |         |                        |                   |
|                    |            | 416              | OG_416                          | Inadequate distinction between positive and negative samples |                        |         |                        |                   |
|                    |            | 2278             | OG_2278_set1_F1                 | GAAACGTGCTAAACAGCTAGG                                        | GGGTGATGATTGGAAGGTA    | 233     | 77                     |                   |
|                    |            | OG_2278_set1_F2  | GAGAGCAAAGCAATTAGGAG            | GGGTGATGATTGGAAGGTA                                          | 228                    | 77.5    |                        |                   |
|                    |            | OG_2278_set1_F3  | GGTGAATCTAGTGCTAG               | GGGTGATGATTGGAAGGTA                                          | 214                    | 78      |                        |                   |
| Pneumonia          | 2254       | OG_2254_set1     | CTAAAGCAGCTAAGTACCTGC           | CCACCAGAAACCTTGATATC                                         | 593                    | 79-80.5 |                        |                   |
|                    |            | OG_2254_set2     | GATATCCAACACCATACGC             | GCTTCCACACAATACGCTCA                                         | 551                    | 77      |                        |                   |
|                    | 2687       | OG_2687          | GAACATCTTCATGAACGC              | CCCTAATTTCTATAGAAGACGC                                       | 125                    | 77      |                        |                   |
|                    | 2278       | OG_2278_set1_F1  | GAAACGTGCTAAACAGCTAGG           | GGGTGATGATTGGAAGGTA                                          | 233                    | 77      |                        |                   |
|                    |            |                  | OG_2278_set1_F2                 | GAGAGCAAAGCAATTAGGAG                                         | GGGTGATGATTGGAAGGTA    | 228     | 77.5                   |                   |
|                    |            | OG_2278_set1_F3  | GGTGAATCTAGTGCTAG               | GGGTGATGATTGGAAGGTA                                          | 214                    | 78      |                        |                   |
| 30-day             | 17         | OG_17            | TACAGCTGTGAAAGCCTTGG            | CCTGAGAATCCAGATGGCTATC                                       | 161                    | 80      | 84                     |                   |



|                  |            |        |                         |                    |         |         |
|------------------|------------|--------|-------------------------|--------------------|---------|---------|
| <b>mortality</b> | <b>675</b> | OG_675 | CGTTGCAAGAATGTAAGCGATGA | CAGAGGGCAATCCTGACT | 208     | 80.5-82 |
|                  | <b>58</b>  | OG_58  | GCTTGACGGCTACGAGG       | CGGCTGGGTGTTGATTG  | 174-195 | 78.5-82 |

45 To detect all sequence variants of OG\_2278 3 different forward primers were used in separate reactions.

46 Abbreviations: OG: orthologous gene; bp: base pairs; MT: melting temperature.

47 **Supplementary tables**

48

49 **Supplementary table 1** Individual k-mers associated with clinical IPD phenotype in index cohort  $p < e-6$

| Phenotype                             | K-mer  | OG   | Core OG | Annotation                                          | Direction | p-value |
|---------------------------------------|--------|------|---------|-----------------------------------------------------|-----------|---------|
| <b>Pneumonia</b>                      | X10_9  | 856  | no      | gp19                                                | neg       | 7E-07   |
|                                       | X10_9  | 163  | no      | zinc metalloproteinase                              | neg       | 7E-07   |
| <b>Meningitis</b>                     | X11_41 | 2093 | no      | transmembrane protein                               | pos       | 6E-07   |
|                                       | X11_32 | 340  | yes     | DNA polymerase III subunits gamma and tau           | neg       | 7E-07   |
|                                       | X11_86 | 10   | no      | ABC transporter ATP-binding protein/permease        | pos       | 9E-07   |
| <b>Immunocompromising therapy</b>     | X3_1   | 35   | no      | endo-beta-N-acetylglucosaminidase                   | neg       | 3E-07   |
|                                       | X3_1   | 212  | no      | ABC transporter ATP-binding protein/permease        | neg       | 3E-07   |
|                                       | X3_1   | 175  | no      | phage holin                                         | neg       | 3E-07   |
|                                       | X3_1   | 1078 | yes     | phosphatase                                         | neg       | 3E-07   |
| <b>Diabetes mellitus</b>              | X5_1   | 1415 | yes     | 6-phosphogluconolactonase                           | neg       | 8E-08   |
|                                       | X5_5   | 521  | yes     | ABC transporter permease                            | neg       | 8E-08   |
| <b>Antibiotics prior to admission</b> | X8_1   | 870  | no      | UDP-glucuronate 5'-epimerase                        | neg       | 5E-09   |
|                                       | X8_1   | 255  | yes     | excinuclease ABC subunit A                          | neg       | 5E-09   |
|                                       | X8_1   | 1277 | yes     | flavoprotein                                        | neg       | 5E-09   |
|                                       | X8_10  | 323  | yes     | alpha-amylase                                       | neg       | 5E-09   |
|                                       | X8_2   | 335  | no      | metallo-beta-lactamase superfamily protein          | neg       | 5E-09   |
|                                       | X8_2   | 169  | no      | hypothetical protein                                | neg       | 5E-09   |
|                                       | X8_3   | 1701 | no      | BlpM                                                | neg       | 5E-09   |
|                                       | X8_4   | 216  | yes     | DNA polymerase I - 3'-5' exonuclease and polymerase | neg       | 5E-09   |
|                                       | X8_5   | 967  | yes     | hypothetical protein                                | neg       | 5E-09   |
|                                       | X8_5   | 610  | no      | serine/threonine protein kinase                     | neg       | 5E-09   |
|                                       | X8_5   | 243  | no      | HAD superfamily hydrolase                           | neg       | 5E-09   |
|                                       | X8_7   | 546  | no      | single-stranded DNA-binding protein                 | neg       | 5E-09   |
|                                       | X8_7   | 3012 | no      | hypothetical protein                                | neg       | 5E-09   |
|                                       | X8_14  | 192  | yes     | single-stranded DNA-specific exonuclease            | pos       | 5E-09   |
|                                       | X8_14  | 1533 | no      | UDP-N-acetylglucosamine-2-epimerase                 | pos       | 5E-09   |
|                                       | X8_15  | 6    | no      | cell-division ATP-binding protein FtsE              | pos       | 5E-09   |
|                                       | X8_16  | 1266 | yes     | GIY-YIG domain-containing protein                   | pos       | 5E-09   |
|                                       | X8_17  | 321  | yes     | cation transporter E1-E2 family ATPase              | pos       | 5E-09   |
|                                       | X8_18  | 2968 | no      | GNAT family acetyltransferase                       | pos       | 5E-09   |
|                                       | X8_18  | 221  | no      | tyrosine-protein phosphatase CpsB                   | pos       | 5E-09   |
|                                       | X8_19  | 932  | yes     | xanthine phosphoribosyltransferase                  | pos       | 5E-09   |
|                                       | X8_19  | 670  | no      | lactoylglutathione lyase                            | pos       | 5E-09   |
|                                       | X8_20  | 1359 | no      | dTDP-4-dehydrorhamnose 3                            | pos       | 5E-09   |
|                                       | X8_21  | 26   | no      | oligopeptide binding lipoprotein                    | pos       | 5E-09   |
|                                       | X8_22  | 12   | no      | IS1239 transposase                                  | pos       | 5E-09   |
|                                       | X8_22  | 1232 | no      | branched-chain aa ABC transporter permease          | pos       | 5E-09   |
|                                       | X8_23  | 347  | yes     | Gfo/Idh/MocA family oxidoreductase                  | pos       | 5E-09   |
|                                       | X8_23  | 10   | no      | ABC transporter ATP-binding protein/permease        | pos       | 5E-09   |
|                                       | X8_26  | 21   | no      | cell envelope integrity inner membrane protein Tol  | pos       | 5E-09   |
|                                       | X8_29  | 669  | yes     | dihydrofolate reductase                             | pos       | 5E-09   |

50

51

52 Supplementary table 2 OG-clustered k-mers associated with clinical IPD phenotype in index cohort

| Phenotype                             | OG                 | Annotation                                          | # k-mers                                   | Direction | avg p-value |       |
|---------------------------------------|--------------------|-----------------------------------------------------|--------------------------------------------|-----------|-------------|-------|
| <b>Pneumonia</b>                      | 5                  | choline binding protein A                           | 2                                          | neg       | 4E-06       |       |
|                                       | 856                | gp19                                                | 2                                          | neg       | 4E-06       |       |
| <b>Meningitis</b>                     | 9                  | zinc metalloprotease                                | 27                                         | pos       | 5E-06       |       |
|                                       | 2725               | O-Antigen ligase                                    | 5                                          | pos       | 8E-06       |       |
|                                       | 1613               | phage protein                                       | 4                                          | pos       | 4E-06       |       |
|                                       | 1                  | transposase, IS1193                                 | 4                                          | pos       | 7E-06       |       |
|                                       | 876                | cof family protein                                  | 3                                          | both      |             |       |
|                                       | 2721               | phospholipase A2 SlaA                               | 3                                          | pos       | 5E-06       |       |
|                                       | 1216               | SNF2 family protein                                 | 3                                          | pos       | 6E-06       |       |
|                                       | 8                  | competence factor transporting ATP-binding protein  | 3                                          | pos       | 6E-06       |       |
|                                       | 1076               | CvpA family protein                                 | 3                                          | neg       | 2E-06       |       |
|                                       | 5                  | choline binding protein A                           | 2                                          | both      |             |       |
|                                       | 43                 | endo-alpha-N-acetylgalactosaminidase                | 2                                          | both      |             |       |
|                                       | 225                | ABC zinc transporter                                | 2                                          | both      |             |       |
|                                       | 301                | ROK family protein                                  | 2                                          | both      |             |       |
|                                       | 412                | DNA ligase                                          | 2                                          | both      |             |       |
|                                       | 423                | Esterase                                            | 2                                          | both      |             |       |
|                                       | 1452               | serine/threonine metallophosphatase                 | 2                                          | both      |             |       |
|                                       | 2093               | transmembrane protein                               | 2                                          | pos       | 2E-06       |       |
|                                       | 1374               | TraG/TraD family protein, Type IV secretory pathway | 2                                          | pos       | 3E-06       |       |
|                                       | 271                | ABC-type transport system involved in multi-copper  | 2                                          | pos       | 4E-06       |       |
|                                       | 313                | caax amino protease family protein                  | 2                                          | pos       | 4E-06       |       |
|                                       | 22                 | glycosyl transferase family protein                 | 2                                          | pos       | 4E-06       |       |
|                                       | 2053               | hypothetical protein                                | 2                                          | pos       | 5E-06       |       |
|                                       | 1799               | capsular polysaccharide synthesis protein           | 2                                          | pos       | 6E-06       |       |
|                                       | 1095               | glycoside hydrolase family protein                  | 2                                          | pos       | 7E-06       |       |
|                                       | 41                 | PTS system lactose-specific transporter subunit II  | 2                                          | pos       | 7E-06       |       |
|                                       | 24                 | choline-binding protein F                           | 2                                          | pos       | 8E-06       |       |
|                                       | 2947               | Restriction endonuclease BpuJI - N terminal         | 2                                          | pos       | 8E-06       |       |
|                                       | 1616               | CI-like repressor                                   | 2                                          | pos       | 9E-06       |       |
|                                       | 47                 | ABC transporter ATP-binding protein                 | 2                                          | neg       | 2E-06       |       |
|                                       | 2429               | AAA ATPase                                          | 2                                          | neg       | 2E-06       |       |
|                                       | 555                | D-ala ligase                                        | 2                                          | neg       | 4E-06       |       |
|                                       | 568                | SpeK                                                | 2                                          | neg       | 4E-06       |       |
|                                       | 470                | lantibiotic modifying enzyme                        | 2                                          | neg       | 8E-06       |       |
|                                       | 519                | ABC transporter-sugar transport, N-acetylneuramina  | 2                                          | neg       | 8E-06       |       |
|                                       | 747                | ABC transporter substrate-binding protein           | 2                                          | neg       | 8E-06       |       |
|                                       | 1392               | lantibiotic modifying enzyme, serine/threonine prot | 2                                          | neg       | 8E-06       |       |
|                                       | <b>Early death</b> | 1531                                                | FtsK/SpoIIIE protein                       | 5         | pos         | 4E-06 |
|                                       |                    | 318                                                 | MurD D-glutamic acid adding enzyme         | 4         | both        | 4E-06 |
|                                       |                    | 1938                                                | oligosaccharide repeat unit polymerase Wzy | 3         | pos         | 4E-06 |
|                                       |                    | 252                                                 | Integrase                                  | 2         | both        |       |
|                                       |                    | 163                                                 | G5 domain family                           | 2         | pos         | 4E-06 |
|                                       |                    | 840                                                 | flippase                                   | 2         | pos         | 4E-06 |
| 1441                                  |                    | SAP domain-containing protein                       | 2                                          | pos       | 4E-06       |       |
| 33                                    |                    | beta-galactosidase                                  | 2                                          | neg       | 4E-06       |       |
| 43                                    |                    | endo-alpha-N-acetylgalactosaminidase                | 2                                          | neg       | 4E-06       |       |
| 941                                   |                    | orotate phosphoribosyltransferase                   | 2                                          | neg       | 4E-06       |       |
| 1597                                  |                    | competence associated protein                       | 2                                          | neg       | 4E-06       |       |
| <b>Diabetes mellitus</b>              |                    | 521                                                 | ABC transporter permease                   | 2         | neg         | 6E-07 |
|                                       |                    | 1277                                                | flavoprotein                               | 4         | both        | 5E-09 |
|                                       | 6                  | cell-division ATP-binding protein FtsE              | 3                                          | both      |             |       |
| <b>Antibiotics prior to admission</b> | 21                 | cell envelope integrity inner membrane protein Tol  | 3                                          | pos       | 5E-09       |       |
|                                       | 243                | HAD superfamily hydrolase                           | 3                                          | both      | 5E-09       |       |

|     |                                                |   |      |       |
|-----|------------------------------------------------|---|------|-------|
| 335 | metallo-beta-lactamase superfamily protein     | 3 | both | 5E-09 |
| 669 | dihydrofolate reductase                        | 3 | pos  | 5E-09 |
| 192 | single-stranded DNA-specific exonuclease       | 2 | pos  | 5E-09 |
| 546 | single-stranded DNA-binding protein            | 2 | neg  | 5E-09 |
| 744 | galactose mutarotase-like enzyme, protein LacX | 2 | neg  | 8E-06 |

54 **Supplementary figures**

55

56 Supplementary figure 1 Sequence variation within confirmed orthologous genes

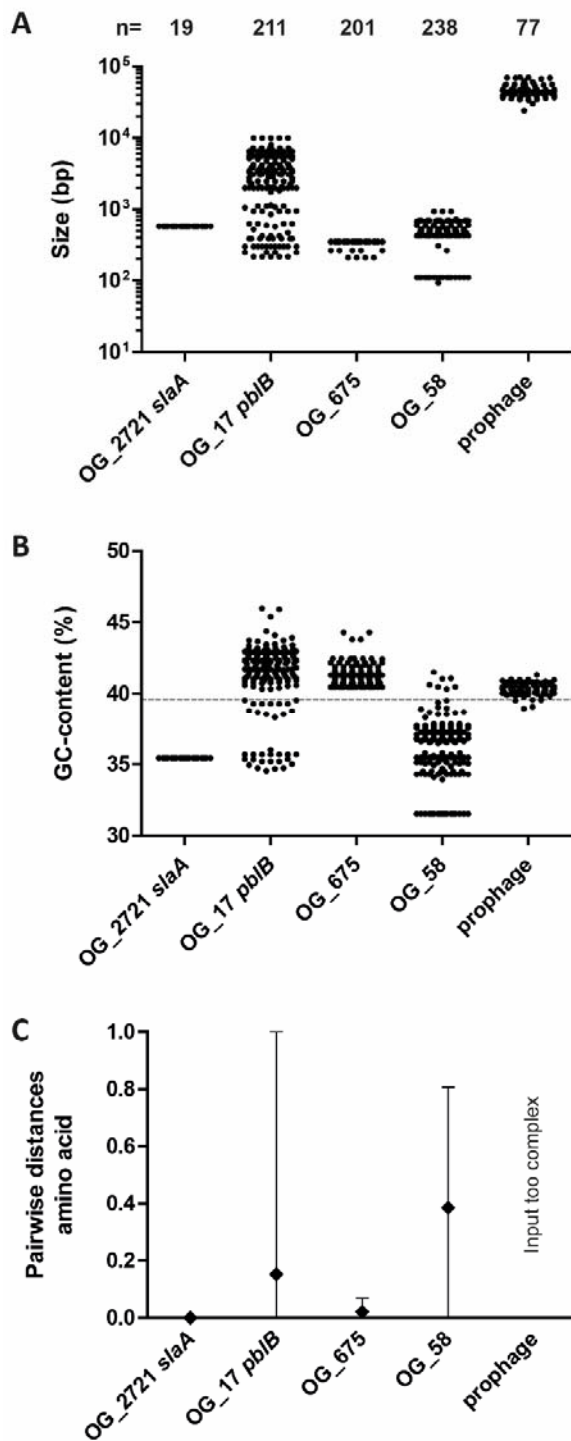

57

58 Supplementary figure 2 Distribution of 2 confirmed orthologous genes in the pneumococcal population

59

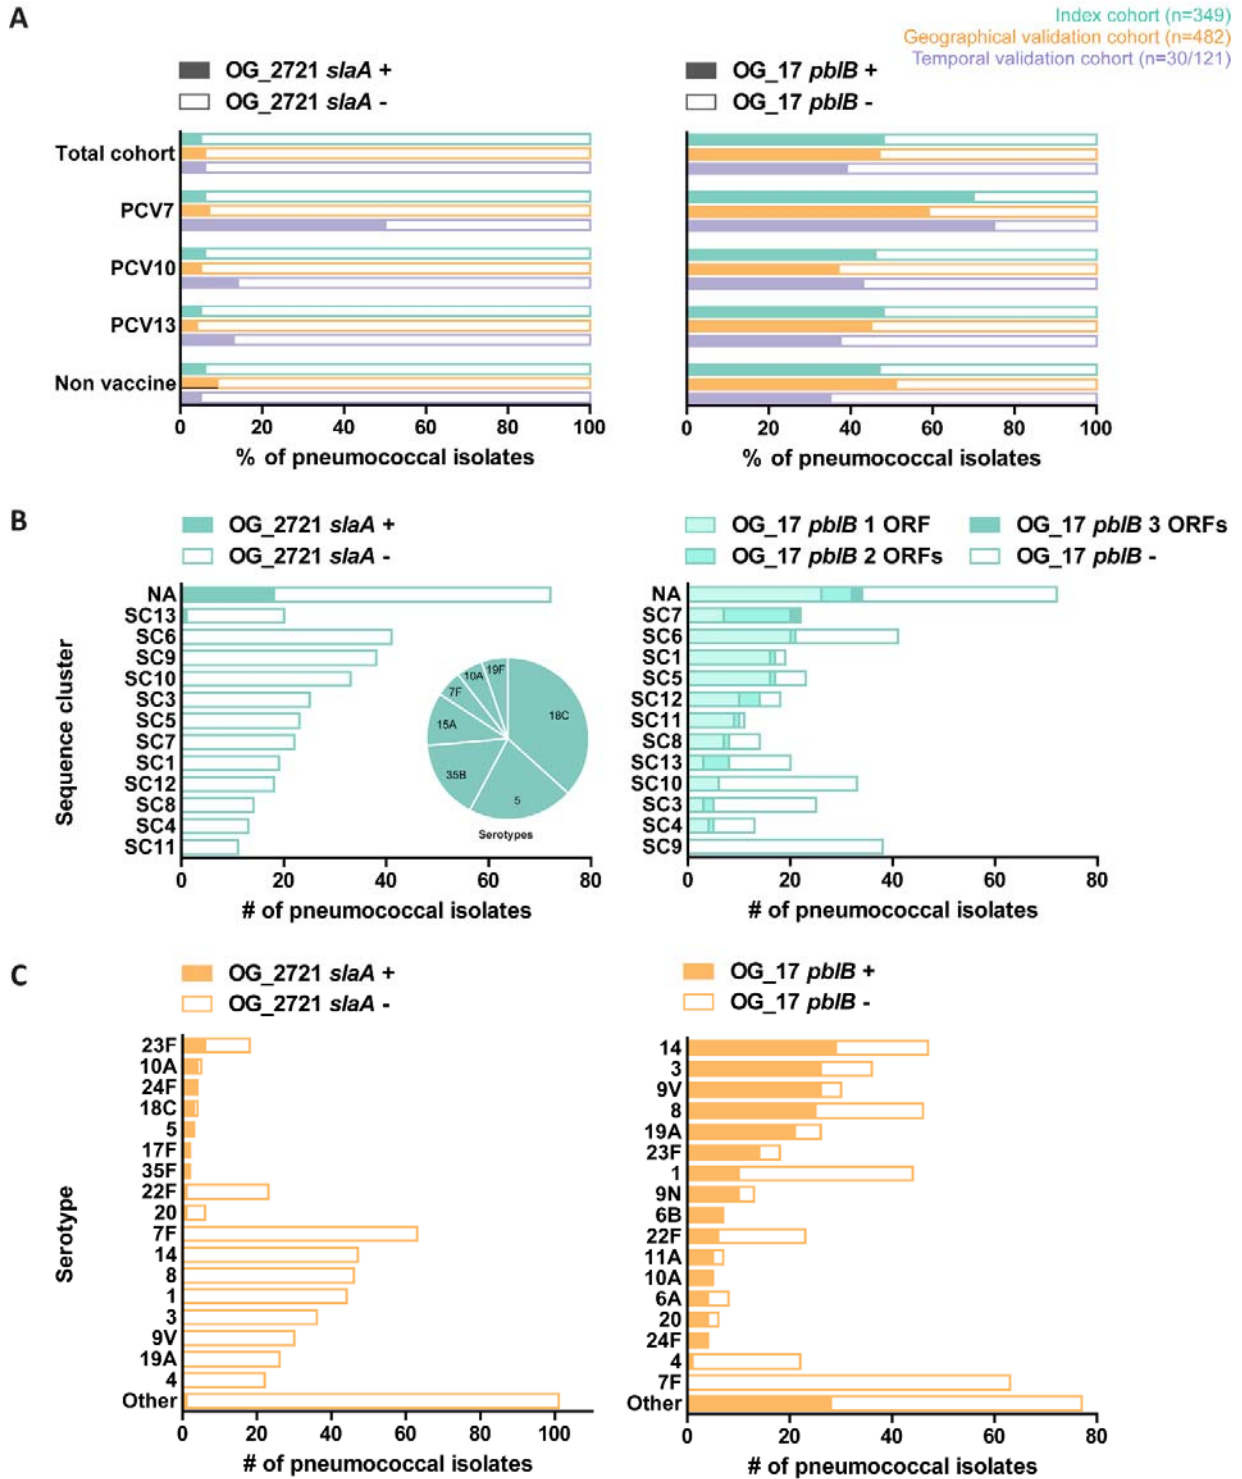

60
